# Supplementary material for: Synthesis of cyclohexapeptides as antimalarial and anti-trypanosomal agents
Source: Royal Society of Chemistry journal article supplement (doi:10.1039/c4md00135d), 2014-01-01

## Supporting Information

# Synthesis of Cyclohexapeptides as Antimalarial and Anti- trypanosomal Agents

### Table of Contents

|                                                                 |    |
|-----------------------------------------------------------------|----|
| General Information and Experimental Procedures .....           | S2 |
| <sup>1</sup> H-NMR, <sup>13</sup> C-NMR, IR, HRMS spectra ..... | S8 |

**General Experimental Methods:** Optical rotations were measured using a Kruss Optronic GmbH P8000 polarimeter with a 0.5 mL cell. IR spectra were recorded on a Shimadzu FTIR 8101A spectrophotometer.  $^1\text{H}$  NMR and  $^{13}\text{C}$  NMR spectra were recorded on Bruker Advance DPX- 400. Chemical shifts are related to TMS as an internal standard. High resolution mass spectra (HRMS) were obtained on a micro Q-TOF (ESI) (Bruker Daltonics) and LTQ-FT Ultra (NanoESI) (Thermo Scientific). Flash column chromatography was carried out with Silica gel 60 (J.T. Baker, 40  $\mu\text{m}$  average particle diameter). All reactions and chromatographic separations were monitored by TLC, conducted on 0.25 mm Silica gel plastic sheets (Macherey/Nagel, Polygram\_ SIL G/UV 254). TLC plates were analyzed under 254 nm UV light, iodine vapor, p-hydroxybenzaldehyde spray or ninhydrin spray. Yields are reported for chromatographically and spectroscopically ( $^1\text{H}$  and  $^{13}\text{C}$  NMR) pure compounds. Analytical HPLC was performed on a Waters 2695 Separations Module equipped with a Waters XBridge C18 column (75 x 4.6 mm, 2.5  $\mu\text{m}$  particle size) and Waters 996 photodiode array detector or on a Shimadzu (LC-10AT Pump) equipped with a Waters  $\mu\text{Bondapak}^{\text{TM}}$  C18 column (150 x 3.9 mm, 10  $\mu\text{m}$ ) and a SPD20A prominence UV/Vis detector. All solvents were purified according to literature procedures.<sup>1</sup> All reactions were carried out in dry, freshly distilled solvents under anhydrous conditions unless otherwise stated.

**SPPS general procedure 1:** The synthesis was done in a plastic syringe equipped with teflon filters attached to a vacuum manifold to enable rapid removal of reagents and solvents. The 2-chlorotriylchloride resin (loading = 1.0 mmol/g; 100 mg) was washed with  $\text{CH}_2\text{Cl}_2$  (5  $\times$  30 sec), DMF (5  $\times$  30 sec) and again with  $\text{CH}_2\text{Cl}_2$  (5  $\times$  30 sec). A solution of Fmoc-AA-OH (1 mmol/g of resin) in minimal  $\text{CH}_2\text{Cl}_2$  and DIPEA (7 eq.) was gently shaken for 1 h, then an extra 3 eq. of DIPEA was added and shaking was continued for 5 min. MeOH (0.08 mL/ g of resin) was then added in order to cap unreacted functional groups on the resin; the mixture was then shaken for 20-30 min. The resin was filtered, and washed with  $\text{CH}_2\text{Cl}_2$  and DMF (5  $\times$  30 sec. each). The N-terminus was deprotected using 20% piperidine in DMF (2  $\times$  5 min and 1  $\times$  10 min). The resin was then washed with DMF,  $\text{CH}_2\text{Cl}_2$  and DMF (5  $\times$  30 sec. each). Fmoc-AA-OH (3 eq.) was pre-activated by vigorous shaking for 4 min in the presence of DIC (3 eq.) and HOAt (3 eq.) in minimal DMF,

---

<sup>1</sup> Perrin, D. D. ; Armarego, W. L. F. "Purification of Laboratory Chemicals", 3<sup>th</sup> Ed. Pergamon Press, Oxford, 1988.

and then poured onto the resin and the resulting mixture was gently shaken for 1-2 h. After the coupling was completed, the resin was washed with CH<sub>2</sub>Cl<sub>2</sub> and DMF (5 × 30 sec. each). Deprotection and coupling cycles were repeated with the appropriate amino acids to provide the desired compound.

The peptide was cleaved from the resin by treatment with 1% TFA in CH<sub>2</sub>Cl<sub>2</sub> for 2-3 minutes at room temperature followed by filtration and collection of the filtrate in water. The treatment was repeated 4-5 times. Solvents were removed *in vacuo* and the crude peptide was washed twice with CH<sub>2</sub>Cl<sub>2</sub>, cooled with N<sub>2</sub> liquid and lyophilized to render the desired hexapeptide.

**SPPS general procedure 2:** The synthesis was done in a plastic syringe equipped with Teflon filters attached to a vacuum manifold to enable rapid removal of reagents and solvents. The 2-chlorotritylchloride resin (100-300 mesh, 1.43 mmol/g) was swelled in CH<sub>2</sub>Cl<sub>2</sub> (3 × 30 sec). A solution of the first protected amino acid (Fmoc-Gly-OH, 2.0 eq) in CH<sub>2</sub>Cl<sub>2</sub> and DIPEA (3.0 eq) was gently shaken for 10 min, then an extra 7.0 eq. of DIPEA was added and shaking was continued for 45 min. MeOH (0.8 mL/ g of resin) was then added in order to cap unreacted functional groups on the resin; the mixture was then shaken for 10 min. The resin was filtered, and then washed with CH<sub>2</sub>Cl<sub>2</sub> (x3) and DMF (x3). The N-terminus was deprotected using 20% piperidine in DMF (2 × 5 min and 1 x 10 min). The resin was then washed with DMF (x3). A solution of Fmoc-AA-OH (3 eq.) and DIPEA (6 eq.) in DMF was added to the resin, followed by a solution of HBTU or HCTU (2.9 eq) in DMF. The mixture was stirred for 90 min. After the coupling was completed, the resin was washed with DMF (×3). Deprotection and coupling cycles were repeated with the appropriate amino acids to provide the desired compound. The peptide was cleaved from the resin by treatment with 1% TFA in CH<sub>2</sub>Cl<sub>2</sub> for 2-3 minutes at room temperature followed by filtration and collection of the filtrate in MeOH. The treatment was repeated three times and then the resin washed with CH<sub>2</sub>Cl<sub>2</sub> (x5). Solvents were removed *in vacuo* to obtain the crude hexapeptide.

*cyclo-[L-Val-L-Ser-D-Ile-L-Cys(Trt)-L-Ala-L-Thr(<sup>t</sup>Bu)-] (16)*

The trifluoroacetate salt of H<sub>2</sub>N-D-Ile-L-Cys(Trt)-L-Ala-L-Thr(<sup>t</sup>Bu)-L-Val-L-Ser-OH was obtained following the general SPPS procedure 1. Lyophilization yielded 825 mg (96% yield) of the hexapeptide as a white solid. The purity (91%) was determined by HPLC (linear gradient: 70 to 100% acetonitrile (0.036% TFA) in H<sub>2</sub>O (0.045% TFA) over 8 min; flow rate = 1.0 mL/min; t<sub>R</sub> = 2.78 min). mp: 215-217 °C. α<sub>D</sub> = +

3.04 (c 0.67, MeOH/CHCl<sub>3</sub> (1:1)). HRMS calculated for C<sub>47</sub>H<sub>67</sub>N<sub>6</sub>O<sub>9</sub>S<sub>1</sub> ([M+H]<sup>+</sup>) 891.46963 observed 891.46848

Macrocyclization reaction was performed following the general procedure (dilution 5 mM, 4 days), starting from the trifluoroacetate salt of the amino acid H<sub>2</sub>N-D-Ile-L-Cys(Trt)-L-Ala-L-Thr(O<sup>i</sup>Bu)-L-Val-L-Ser-OH (100 mg, 0.099 mmol). Further purification by flash chromatography, the desired macrocycle was obtained (48 mg, 0.055 mmol) in 55% yield.

White solid, mp: 108-109 °C, R<sub>f</sub> = 0.45 (AcOEt:EP, 3:2). α<sub>D</sub> = - 20.5 (c 1.3, MeOH). <sup>1</sup>H NMR (400 MHz, CDCl<sub>3</sub>) δ ppm 0.90 – 1.00 (m, 9H), 1.05 (d, *J* = 6.8 Hz, 3H), 1.10 (d, *J* = 6.5 Hz, 3H), 1.15 - 1.21 (m, 2H), 1.32 (s, 9H), 1.35 - 1.41 (m, 1H), 1.56 (d, *J* = 7.1 Hz, 3H), 2.18 - 2.23 (m, 1H), 2.29 (dd, *J*<sub>1</sub> = 12.8 Hz, *J*<sub>2</sub> = 6.3 Hz, 1H), 2.34 - 2.41 (m, 1H), 2.75 (dd, *J*<sub>1</sub> = 12.8 Hz, *J*<sub>2</sub> = 5.2 Hz, 1H), 3.47 (dd, *J*<sub>1</sub> = 9.9 Hz, *J*<sub>2</sub> = 3.5 Hz, 1H), 3.72 (t, *J* = 7.2 Hz, 1H), 3.97 (t, *J* = 4.12 Hz, 1H<sub>15</sub>), 3.99 (dd, *J*<sub>1</sub> = 9.9 Hz, *J*<sub>2</sub> = 1.90 Hz, 1H), 4.21 (m, 2H), 4.39 - 4.44 (m, 1H), 4.47 (dd, *J*<sub>1</sub> = 6.5, *J*<sub>2</sub> = 4.6 Hz, 1H), 4.83 (dd, *J*<sub>1</sub> = 9.7 Hz, *J*<sub>2</sub> = 3.6 Hz, 1H), 6.62 (d, *J* = 7.9 Hz, 1H), 6.94 (d, *J* = 7.8 Hz, 1H), 7.03 (d, *J* = 7.2 Hz, 1H), 7.12 (d, *J* = 4.9 Hz, 1H), 7.23 - 7.37 (m, 15H), 7.54 (d, *J* = 9.6 Hz, 1H), 8.16 (d, *J* = 3.5 Hz, 1H). <sup>13</sup>C NMR (100 MHz, CDCl<sub>3</sub>) δ ppm 11.9, 14.8, 15.4, 17.5, 17.7, 19.8, 26.6, 28.3 (3C), 29.1, 29.7, 31.8, 51.5, 52.1, 54.7, 55.6, 57.5, 61.8, 62.8, 65.5, 67.4, 76.3, 127.1 (3C), 127.3 (2C), 127.9 (6C), 128.2 (2C), 129.6 (2C), 144.3 (2C), 146.9, 170.1, 170.4, 170.5, 170.9, 172.3, 172.5. IR ν(cm<sup>-1</sup>) 1080, 1150, 1265, 1385, 1447, 1516, 1628, 1655, 2878, 2932, 2970, 3059, 3306, 3406. HRMS calculated for C<sub>47</sub>H<sub>64</sub>N<sub>6</sub>NaO<sub>8</sub>S ([M+Na]<sup>+</sup>) 895.4404 observed 895.4396.

*cyclo-[Gly-L-Cys(Trt)-L-Ile-L-Cys(Trt)-L-Phe-L-Ser(<sup>i</sup>Bu)-] (17)*

The trifluoroacetate salt of H<sub>2</sub>N-L-Cys(Trt)-L-Ile-L-Cys(Trt)-L-Phe-L-Ser(<sup>i</sup>Bu)-Gly-OH was obtained following the general SPPS procedure 2. Yielded 350 mg (91% yield) of the hexapeptide as a white solid. The purity (90 %) was determined by HPLC (linear gradient: 8 to 100% acetonitrile in H<sub>2</sub>O/ 0.1% TFA over 20 min; flow rate = 1.0 mL/min; t<sub>R</sub> = 13.97 min). mp= decompose above 200 °C. [α]<sub>D</sub><sup>25</sup> = -145.7 (c 0.35, MeOH/H<sub>2</sub>O) HRMS m/z calc. for C<sub>68</sub>H<sub>76</sub>N<sub>6</sub>O<sub>8</sub>S<sub>2</sub> ([M+H]<sup>+</sup>) 1169.5244, found 1169.5115. Macrocyclization reaction was performed following the general procedure (dilution 5mM, 3 days), starting from the trifluoroacetate salt of the amino acid H<sub>2</sub>N-L-Cys(Trt)-L-Ile-L-Cys(Trt)-L-Phe-L-Ser(O<sup>t</sup>-Bu)-L-Gly-OH (300

mg, 0.23 mmol). Further purification by flash chromatography, the desired macrocycle was obtained (129 mg, 0.112 mmol) in 48% yield.

White solid, mp: 123-129 °C, Rf= 0.4 (EtOAc:EP, 3:1).  $[\alpha]_D^{25} = -25.9$  (c 1.35, MeOH).  $^1\text{H}$  NMR (400 MHz,  $\text{CDCl}_3$ )  $\delta$  (ppm): 0.87 (t,  $J=6.7$  Hz, 3H), 0.88 (d,  $J=6.7$  Hz, 3H), 1.07 (m, 1H), 1.11 (s, 9H), 1.48 (m, 1H), 2.00 (m, 1H), 2.55 (m, 1H), 2.59 (m, 1H), 2.70 (m, 1H), 2.80 (m, 1H), 3.01 (m, 1H), 3.17 (m, 1H), 3.36 (m, 1H), 3.43 (m, 1H), 3.55 (m, 1H), 3.62 (m, 1H), 3.87 (t,  $J=7.2$  Hz, 1H), 4.04 (m, 1H), 4.06 (m, 1H), 4.28 (m, 2H), 6.79 (d,  $J=5.4$  Hz, 1H), 6.94 (m, 1H), 7.09-7.18 (m, 6H), 7.18-7.25 (m, 7H), 7.25-7.34 (m, 14H), 7.35-7.40 (m, 6H), 7.40-7.46 (m, 6H).  $^{13}\text{C}$  NMR (100 MHz,  $\text{CDCl}_3$ )  $\delta$ (ppm): 11.07, 15.71, 25.16, 27.43 (3C), 32.26, 32.46, 35.58, 36.52, 38.64, 43.63, 53.37, 54.08, 54.68, 56.07, 60.31, 67.31 (2C), 82.04, 126.94 (2C), 126.97 (3C), 127.26, 127.34, 127.93 (2C), 127.96 (3C), 128.12 (8C), 128.30, 128.66 (2C), 129.36 (2C), 129.48 (5C), 129.54 (5C), 144.21 (3C), 144.25 (3C), 146.90, 170.05, 170.16, 170.62, 170.69, 171.32 (2C). IR  $\nu(\text{cm}^{-1})$  1034, 1157, 1236, 1265, 1365, 1531, 1645, 2931, 2970, 3059, 3296. HRMS  $m/z$  calc. for  $\text{C}_{68}\text{H}_{74}\text{N}_6\text{O}_7\text{S}_2$  ( $[\text{M}+\text{Na}]^+$ ) 1173.4958, found 1173.4912.

*cyclo-[Gly-L-Cys(Trt)-L-Ile-L-Cys(Trt)-L-Ile-L-Cys(Trt)] (18)*

The trifluoroacetate salt of  $\text{H}_2\text{N-L-Cys(Trt)-L-Ile-L-Cys(Trt)-L-Ile-L-Cys(Trt)-Gly-OH}$  was obtained following the general SPPS procedure 2. Yielded 410 mg (94% yield) of the hexapeptide as a white solid. The purity (80 %) was determined by HPLC (linear gradient: 8 to 100% acetonitrile in  $\text{H}_2\text{O}$ / 0.1% TFA over 20 min; flow rate = 1.0 mL/min; tR = 14.52 min m.p. = 182-190.  $[\alpha]_D^{25} = -204.0$  (c 0.25, MeOH/ $\text{H}_2\text{O}$ ). HRMS  $m/z$  calc. for  $\text{C}_{80}\text{H}_{84}\text{N}_6\text{O}_7\text{S}_3$  ( $[\text{M}+\text{Na}]^+$ ) 1359.5462, found 1359.5309.

Macrocyclization reaction was performed following the general procedure (dilution 5mM, 3 days), starting from the trifluoroacetate salt of the amino acid  $\text{H}_2\text{N-L-Cys(Trt)-L-Ile-L-Cys(Trt)-L-Ile-L-Cys(Trt)-Gly-OH}$  (330 mg, 0.227 mmol). Further purification by flash chromatography, the desired macrocycle was obtained (192 mg, 0.145 mmol) in 66% yield.

White solid, mp: 145-147 °C, Rf= 0.5 (EtOAc).,  $[\alpha]_D^{25} = -58.4$  (c 0.5, MeOH).  $^1\text{H}$  NMR (400 MHz,  $\text{CDCl}_3$ )  $\delta$  (ppm): 0.83-0.89 (m, 9H), 0.91 (d,  $J=6.8$  Hz, 3H), 0.99-1.20 (m, 2H), 1.39-1.60 (m, 2H), 1.90-2.10 (m, 2H), 2.52-2.65 (m, 2H), 2.65-2.79 (m, 4H), 3.21-3.30 (m, 1H), 3.51-3.63 (m, 1H), 3.69-3.83 (m, 2H), 3.89-4.03 (m,

3H), 6.78 (d,  $J=6.3$  Hz, 1H), 6.85-6.96 (m, 1H), 7.01 (d,  $J=7.5$  Hz, 1H), 7.04-7.16 (m, 2H), 7.18-7.25 (m, 10H), 7.25-7.33 (m, 18H), 7.38-7.46 (m, 18H).  $^{13}\text{C}$  NMR (100 MHz,  $\text{CDCl}_3$ )  $\delta$ (ppm): 10.78, 11.44, 15.74, 15.87, 24.69, 25.07, 31.93 (2C), 34.86, 35.44, 36.51, 43.88, 53.32, 53.49, 53.98, 59.06, 59.6, 67.03, 67.21 (2C), 126.85 (3C), 126.92 (3C), 126.99 (3C), 127.93 (2C), 127.95 (2C), 128.02 (6C), 128.10 (4C), 128.15 (4C), 129.38 (6C), 129.49 (6C), 129.56 (6C), 144.07 (3C), 144.30 (3C), 144.53 (3C), 165.27, 170.63, 170.76, 170.88, 170.97, 171.43. IR  $\nu(\text{cm}^{-1})$  1033, 1082, 1265, 1445, 1526, 1651, 2931, 2965, 3059, 3385, 3400. HRMS  $m/z$  calc. for  $\text{C}_{80}\text{H}_{82}\text{N}_6\text{O}_6\text{S}_3$  ( $[\text{M}+\text{Na}]^+$ ) 1341.5456, found 1341.5231.

*cyclo-[Gly-L-Cys(Trt)-L-Met-L-Cys(Trt)-L-Ile-L-Thr(Ot-Bu)-]* (**19**)

The trifluoroacetate salt of  $\text{H}_2\text{N-L-Cys(Trt)-L-Met-L-Cys(Trt)-L-Ile-L-Thr(Ot-Bu)-Gly-OH}$  was obtained following the general SPPS procedure 2. Yielded 480 mg (87% yield) of the hexapeptide as a white solid. The purity (94%) was determined by (linear gradient: 8 to 100% acetonitrile in  $\text{H}_2\text{O}$ / 0.1% TFA over 20 min; flow rate = 1.0 mL/min;  $t_R$  = 15.09 min  $m_p$ = decompose above 200 °C.  $[\alpha]_D^{25} = -73.6$  (c 0.5,  $\text{MeOH}/\text{H}_2\text{O}$ ). HRMS  $m/z$  calc. for  $\text{C}_{65}\text{H}_{78}\text{N}_6\text{O}_8\text{S}_3$  ( $[\text{M}+\text{H}]^+$ ) 1167.5121, found 1167.5096.

Macrocyclization reaction was performed following the general procedure (dilution 5mM, 3 days), starting from the trifluoroacetate salt of the amino acid  $\text{H}_2\text{N-L-Cys(Trt)-L-Met-L-Cys(Trt)-L-Ile-L-Thr(Ot-Bu)-L-Gly-OH}$  (340 mg, 0.265 mmol). Further purification by flash chromatography, the desired macrocycle was obtained (165 mg, 0.144 mmol) in 54% yield.

White solid (54%),  $m_p$  = 127-129 °C,  $R_f$  = 0.5 ( $\text{EtOAc}:\text{EP}$ , 3:1),  $[\alpha]_D^{25} = -28.0$  (c 1.35,  $\text{MeOH}$ ).  $^1\text{H}$  NMR (400 MHz,  $\text{CDCl}_3$ )  $\delta$  (ppm): 0.85-0.95 (m, 6H), 1.02 (d,  $J=6.3$  Hz, 3H), 1.05-1.19 (m, 1H), 1.23 (s, 9H), 1.39-1.51 (m, 1H), 1.75-1.86 (m, 1H), 1.80 (s, 3H), 1.89-1.99 (m, 1H), 1.89-2.09 (m, 2H), 2.14-2.24 (m, 1H), 2.48-2.63 (m, 3H), 2.63-2.72 (m, 1H), 2.96-3.06 (m, 1H), 3.17-3.26 (m, 1H), 3.39-3.49 (m, 1H), 3.53-3.71 (m, 2H), 3.94 (t,  $J=6.1$  Hz, 1H), 4.02-4.13 (m, 2H), 4.20-4.27 (m, 1H), 4.46-4.55 (m, 1H), 6.42 (s, 1H), 6.69-6.78 (m, 1H), 6.78-6.88 (m, 1H), 7.20-7.27 (m, 7H), 7.27-7.35 (m, 14H), 7.40 (m, 11H), 7.55 (d,  $J=8.0$  Hz, 1H).  $^{13}\text{C}$  NMR (100 MHz,  $\text{CDCl}_3$ )  $\delta$ (ppm): 11.30, 14.20, 15.39, 15.84, 19.16, 21.04, 22.66, 25.29, 28.26, 29.81, 30.37, 32.18 (2C), 35.59, 44.07, 53.01, 53.57, 55.15, 58.69, 60.56, 67.33, 67.43, 75.05, 127.00 (6C), 128.15 (12C), 129.47 (12C), 144.21 (3C), 144.30 (3C), 165.76, 169.68, 170.36, 171.12, 171.46, 172.03. IR  $\nu(\text{cm}^{-1})$  1082,

1148, 1192, 1236, 1234, 1383, 1445, 1512, 1647, 2931, 2970, 3059, 3287. HRMS  $m/z$  calc. for  $C_{65}H_{76}N_6O_7S_3$  ( $[M+Na]^+$ ) 1171.4836, found 1171.4790.

*cyclo-[Gly-Thz-L-Met-L-Cys-L-Phe-L-Thr(<sup>t</sup>Bu)] (21):*

The trifluoroacetate salt of  $H_2N$ -L-Met-L-Cys-L-Phe-L-Thr(<sup>t</sup>Bu)-Gly-Thz-OH was obtained following the general SPPS procedure 1. Lyophilization yielded 372 mg (98% yield) of the hexapeptide as a pale yellow solid. The purity (90 %) was determined by HPLC (linear gradient: 40 to 90% acetonitrile (0.036% TFA) in  $H_2O$  (0.045% TFA) over 8 min; flow rate = 1.0 mL/min;  $t_R$  = 5.19 min). mp: 89-91 °C.  $\alpha_D$  = - 5.24 (c 0.67, MeOH:CH<sub>2</sub>Cl<sub>2</sub>, (1:1)). HRMS calculated for  $C_{49}H_{59}N_6O_7S_3$  ( $[M+H]^+$ ) 939.3629 observed 939.36019.

Macrocyclization reaction was performed following the general procedure (dilution 1 mM, 5 days) starting from the trifluoroacetate salt of the amino acid  $H_2N$ -L-Met-L-Cys-L-Phe-L-Thr(<sup>t</sup>Bu)-Gly-Thz-OH (100 mg, 0.095 mmol). Further purification by flash chromatography, the desired macrocycle was obtained (35 mg, 0.038 mmol) in 40% yield.

White yellow (35 mg, 40%), mp: 107-109 °C,  $R_f$  = 0.5 (AcOEt:EP, 4:1).  $\alpha_D$  = - 42.8 (c 1.0 g/100 mL, MeOH). <sup>1</sup>H NMR (400 MHz, CDCl<sub>3</sub>)  $\delta$  ppm 1.13 (d,  $J$  = 6.5 Hz, 3H), 1.22-1.24 (m, 9H), 1.82-1.93 (m, 1H), 2.09 (s, 3H), 2.14-2.23 (m, 1H), 2.28 (dd,  $J_1$  = 14.1 Hz,  $J_2$  = 5.4 Hz, 1H), 2.54 (t,  $J$  = 7.6 Hz, 1H), 2.58-2.66 (m, 1H), 2.87 (dd,  $J_1$  = 14.1 Hz,  $J_2$  = 8.5 Hz, 1H), 3.26 (dd,  $J_1$  = 14.1 Hz,  $J_2$  = 10.7 Hz, 1H), 3.42 (dd,  $J_1$  = 14.1 Hz,  $J_2$  = 4.3 Hz, 1H), 3.96-4.03 (m, 1H), 4.21-4.29 (m, 1H), 4.40 (dd,  $J_1$  = 16.6 Hz,  $J_2$  = 4.7 Hz, 1H), 4.43-4.52 (m, 2H), 4.88 (dd,  $J_1$  = 16.6 Hz,  $J_2$  = 6.3 Hz, 1H), 6.4 (bs, 1H), 6.60 (bs, 1H), 6.99-7.02 (m, 3H), 7.05-7.10 (m, 2H), 7.23-7.30 (m, 9H), 7.31-7.37 (m, 7H), 7.87 (s, 1H), 7.94 (bs, 1H), 8.49 (bs, 1H). <sup>13</sup>C NMR (100 MHz, CDCl<sub>3</sub>)  $\delta$  ppm 15.5, 19.1, 28.2 (3C), 30.1, 31.9, 32.5, 35.0, 41.1, 52.2, 54.3, 57.8, 58.4, 66.7, 67.9, 75.6, 122.9, 126.9, 127.1 (3C), 128.2 (6C), 128.8 (2C), 129.1 (2C), 129.5 (6C), 137.4, 143.9 (3C), 149.3, 160.7, 164.9, 169.3, 170.5, 170.7, 171.0. IR  $\nu$ (cm<sup>-1</sup>) 1032, 1082, 1155, 1186, 1265, 1370, 1379, 1445, 1491, 1508, 1528, 1545, 1655, 1676, 2849, 2918, 3055, 3345. HRMS calculated  $C_{49}H_{56}N_6NaO_6S_2$  ( $[M+Na]^+$ ) 943.3221 observed 943.3279.

# HRMS - Hexapeptide precursor of 15

C:\Xcalibur\...\110718\_SP-B2\_1  
H2O:ACN

7/18/2011 10:17:01 AM

110718\_SP-B2\_1

110718\_SP-B2\_1 #1 RT: 75.29 AV: 1 NL: 1.08E7  
T: FTMS + p NSI Full ms [100.00-2000.00]

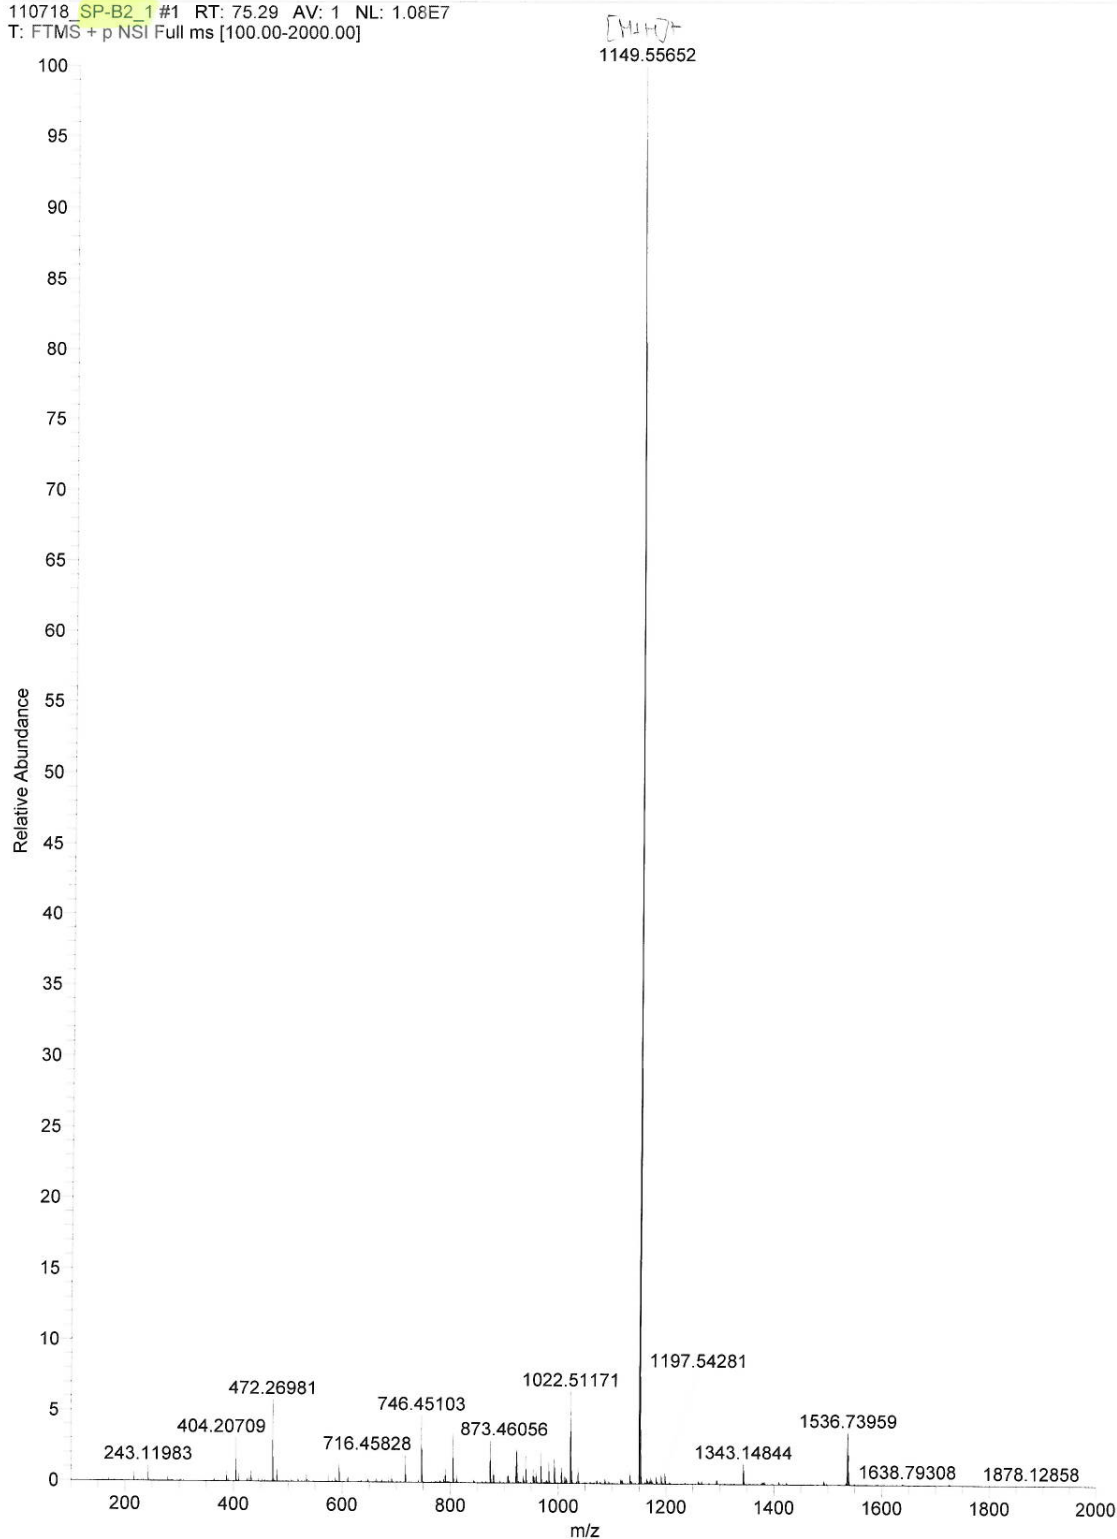



# HPLC - Hexapeptide precursor of 15

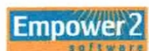

Default

## SAMPLE INFORMATION

|                   |                           |                     |              |
|-------------------|---------------------------|---------------------|--------------|
| Sample Name:      | SP_B g70100               | Acquired By:        | System       |
| Sample Type:      | Unknown                   | Sample Set Name:    | 13072011     |
| Vial:             | 81                        | Acq. Method Set:    | A7010018Tamb |
| Injection #:      | 1                         | Processing Method:  | ste          |
| Injection Volume: | 5.00 ul                   | Channel Name:       | 220.0nm      |
| Run Time:         | 11.0 Minutes              | Proc. Chnl. Descr.: | PDA 220.0 nm |
| Date Acquired:    | 7/13/2011 1:44:19 PM CEST |                     |              |
| Date Processed:   | 7/13/2011 3:49:47 PM CEST |                     |              |

## Auto-Scaled Chromatogram

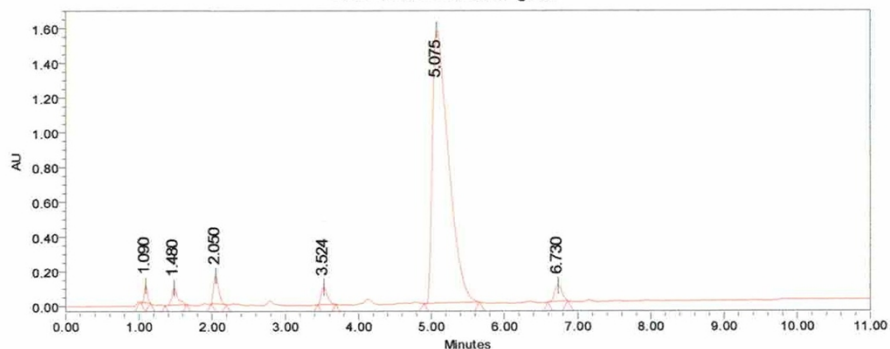

## Peak Results

|   | RT    | Area     | Height  | Total Area | % Area |
|---|-------|----------|---------|------------|--------|
| 1 | 1.090 | 300994   | 97846   | 26794061   | 1.12   |
| 2 | 1.480 | 548986   | 99772   | 26794061   | 2.05   |
| 3 | 2.050 | 777696   | 160588  | 26794061   | 2.90   |
| 4 | 3.524 | 586186   | 100802  | 26794061   | 2.19   |
| 5 | 5.075 | 23940049 | 1571087 | 26794061   | 89.35  |
| 6 | 6.730 | 640151   | 92903   | 26794061   | 2.39   |

Reported by User: System  
 Report Method: Default  
 Report Method ID: 1840  
 Page: 1 of 2

Project Name: Juliol\_2011  
 Date Printed:  
 7/13/2011  
 3:51:16 PM Europe/Madrid

**<sup>1</sup>H-RMN Macrocycle 15**

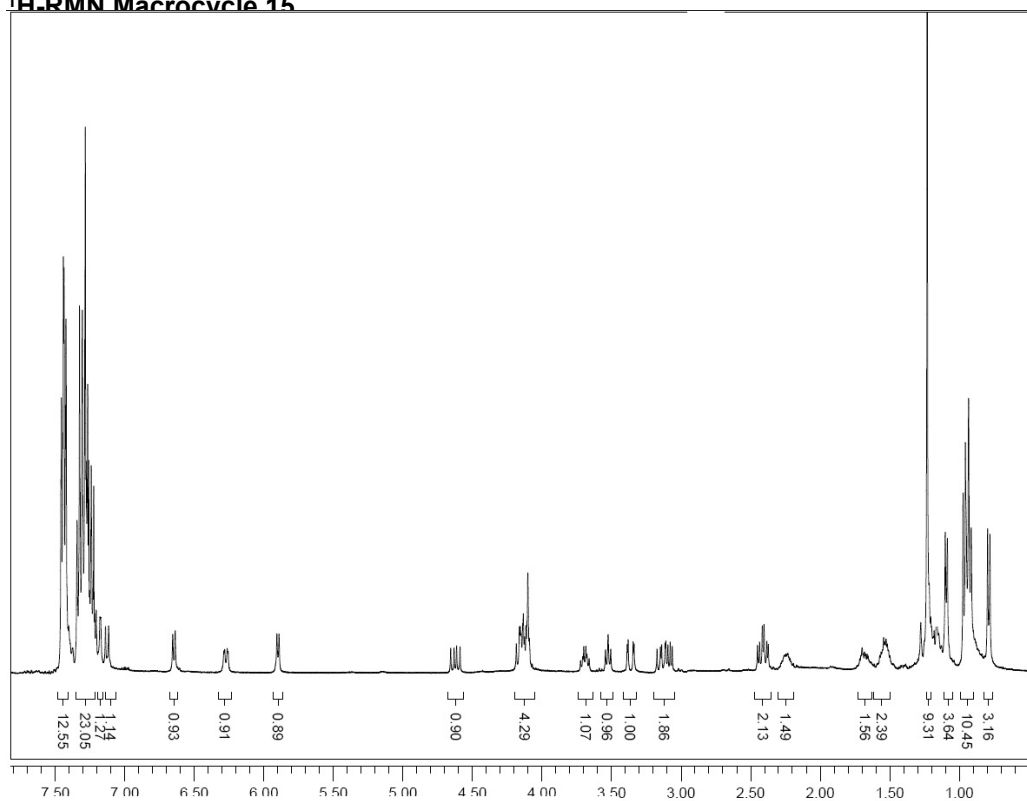

**<sup>13</sup>C-RMN Macrocycle 15**

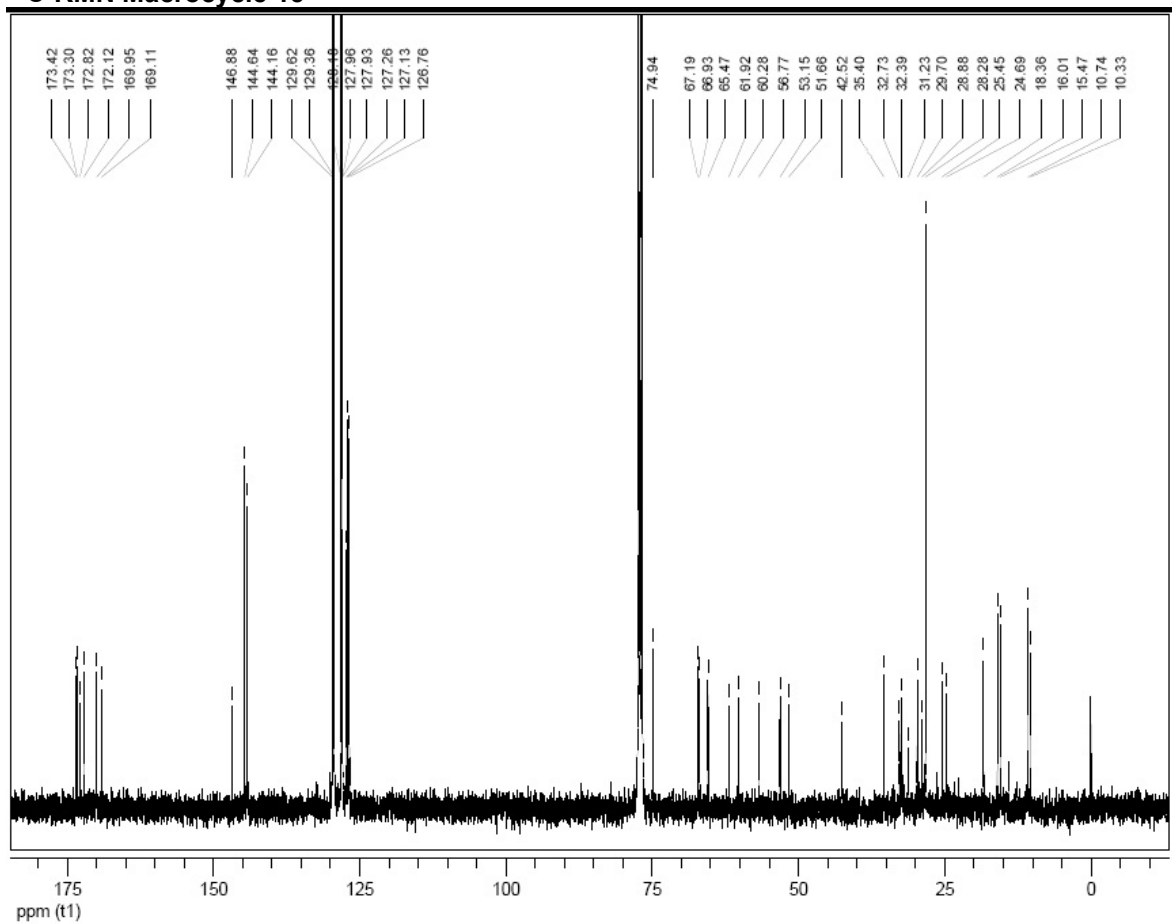

## HRMS – Macrocycle 15

### Generic Display Report (all)

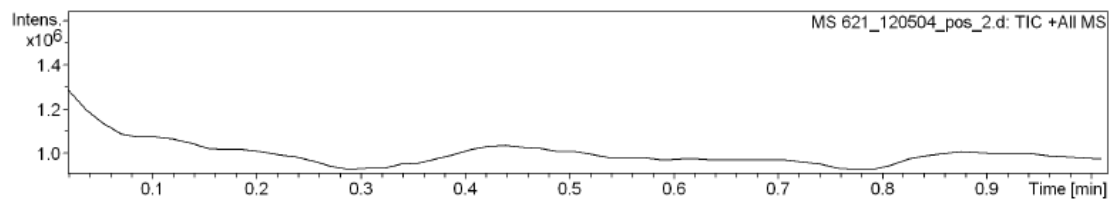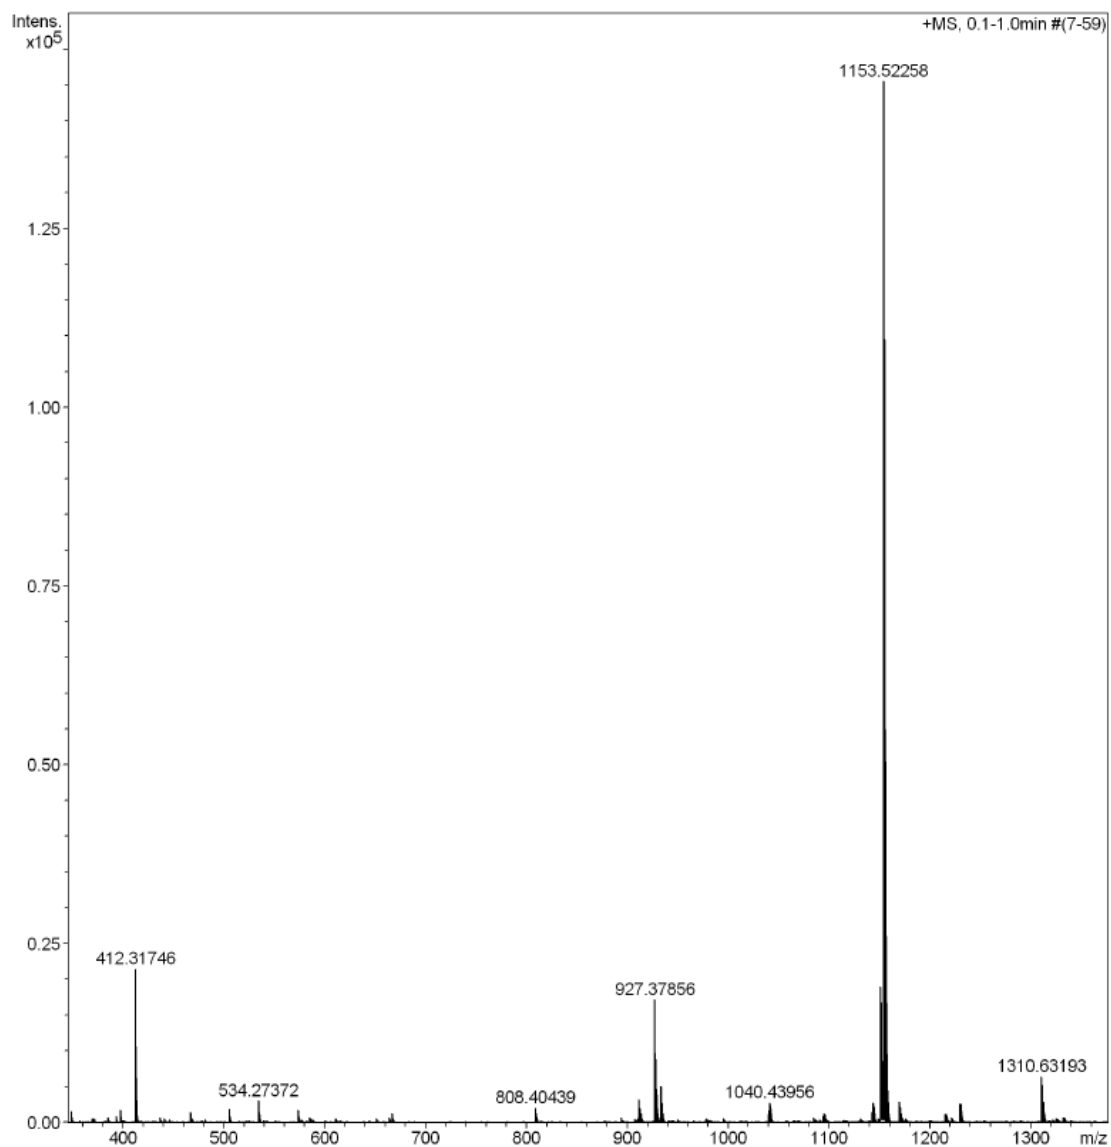

# IR – Macrocycle 15

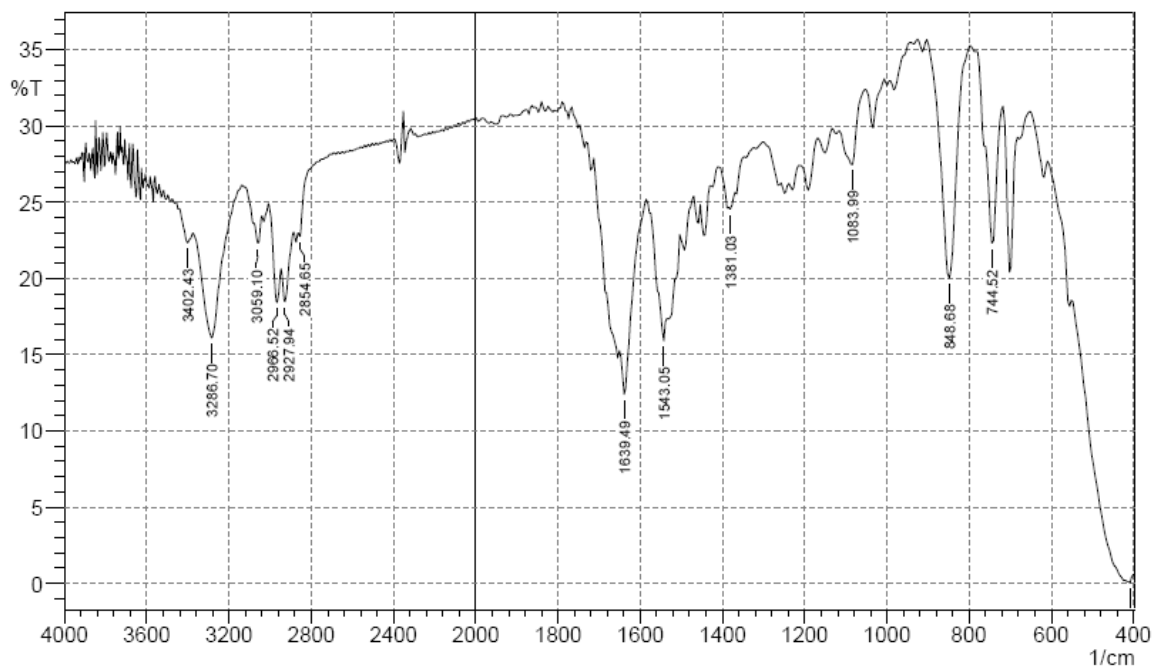

# HRMS –Hexapeptide precursor of 16

H<sub>2</sub>O:ACN

110718 SP-C\_1 #1 RT: 78.11 AV: 1 NL: 5.04E6

T: FTMS + p NSI Full ms [100.00-2000.00]

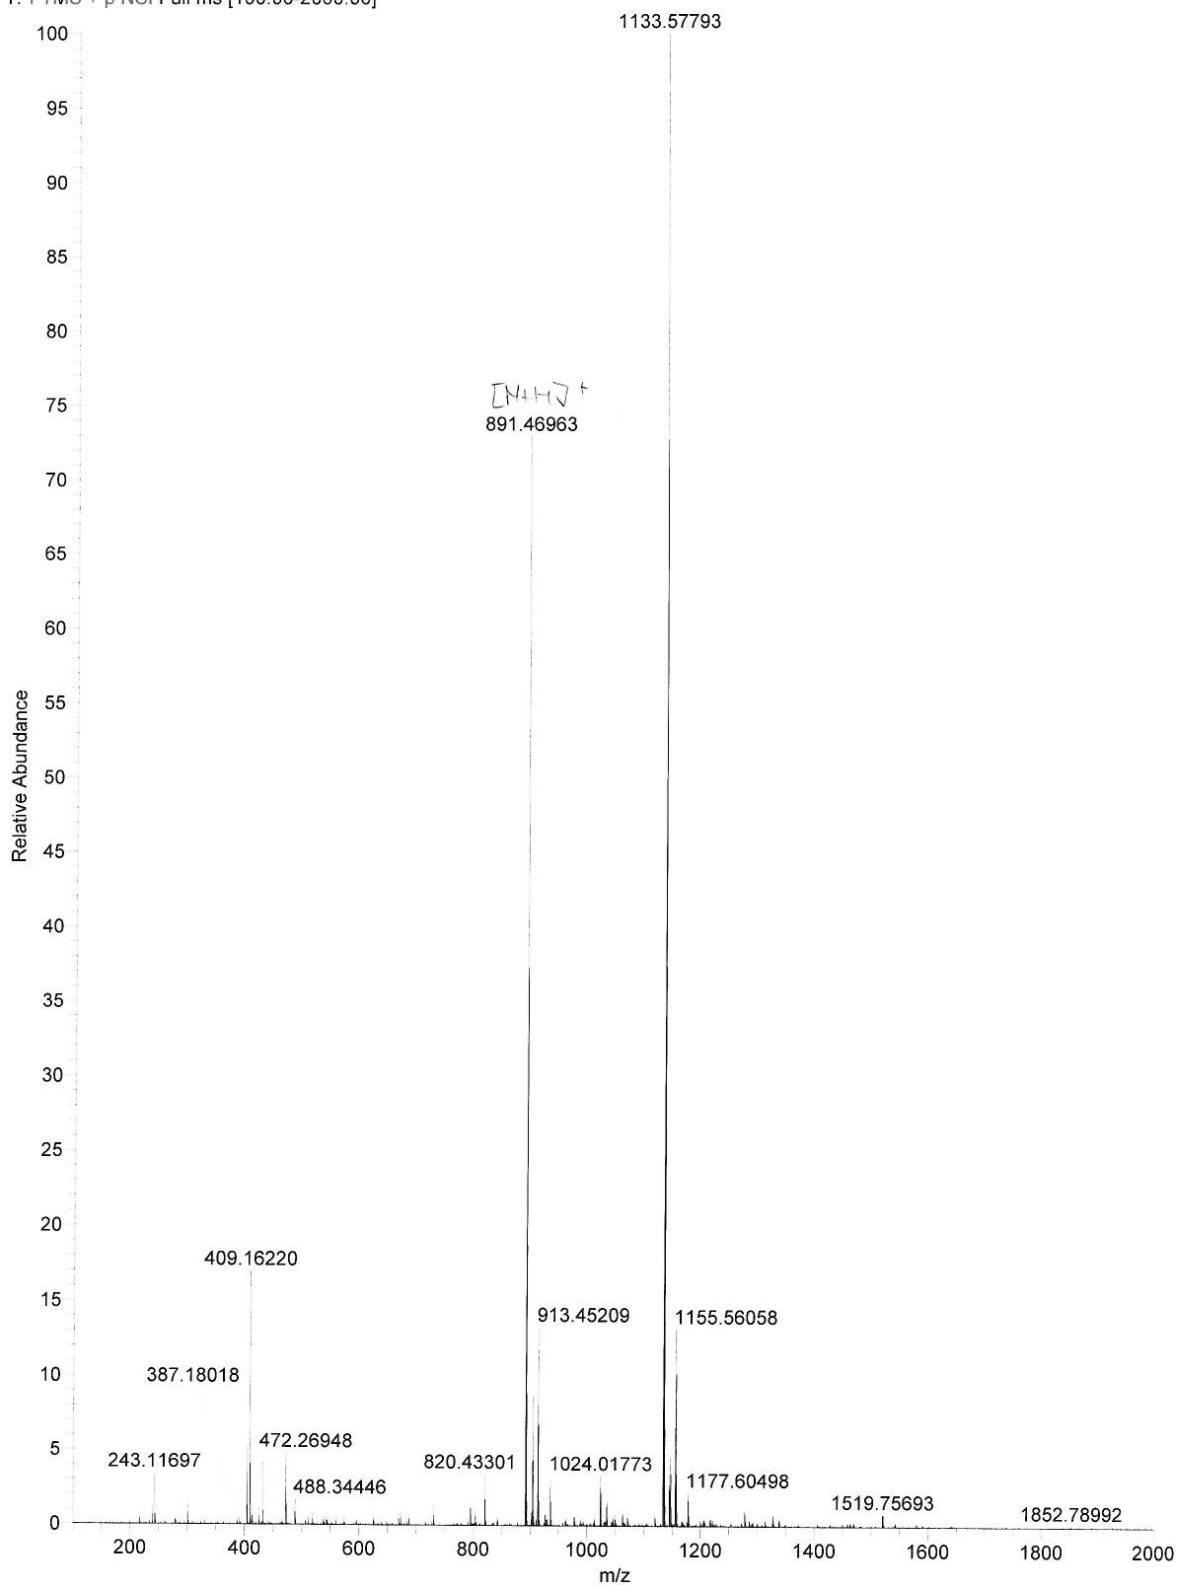

# HPLC – Hexapeptide precursor of 16

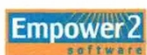

Default

| SAMPLE INFORMATION |                           |                     |              |
|--------------------|---------------------------|---------------------|--------------|
| Sample Name:       | SP_C g70100               | Acquired By:        | System       |
| Sample Type:       | Unknown                   | Sample Set Name:    | 120711       |
| Vial:              | 79                        | Acq. Method Set:    | A70100t8Tamb |
| Injection #:       | 1                         | Processing Method:  | Default      |
| Injection Volume:  | 5.00 ul                   | Channel Name:       | 220.0nm      |
| Run Time:          | 11.0 Minutes              | Proc. Chnl. Descr.: | PDA 220.0 nm |
| Date Acquired:     | 7/12/2011 2:05:11 PM CEST |                     |              |
| Date Processed:    | 7/12/2011 2:20:35 PM CEST |                     |              |

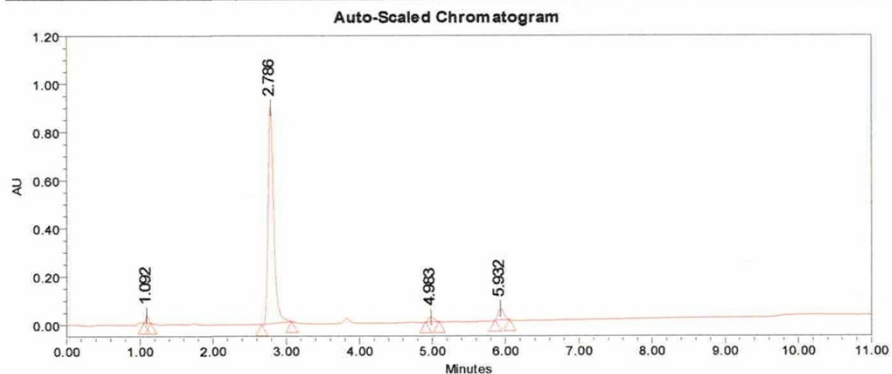

Peak Results

|   | RT    | Area    | Height | Total Area | % Area |
|---|-------|---------|--------|------------|--------|
| 1 | 1.062 | 89903   | 31302  | 5292937    | 1.70   |
| 2 | 2.786 | 4821112 | 897164 | 5292937    | 91.09  |
| 3 | 4.983 | 111093  | 20574  | 5292937    | 2.10   |
| 4 | 5.932 | 270829  | 47927  | 5292937    | 5.12   |

Reported by User: System  
 Report Method: Default  
 Report Method ID: 1624  
 Page: 1 of 2

Project Name: Juliol\_2011  
 Date Printed:  
 7/12/2011  
 2:22:03 PM Europe/Madrid

**<sup>1</sup>H-NMR Macrocycle 16**

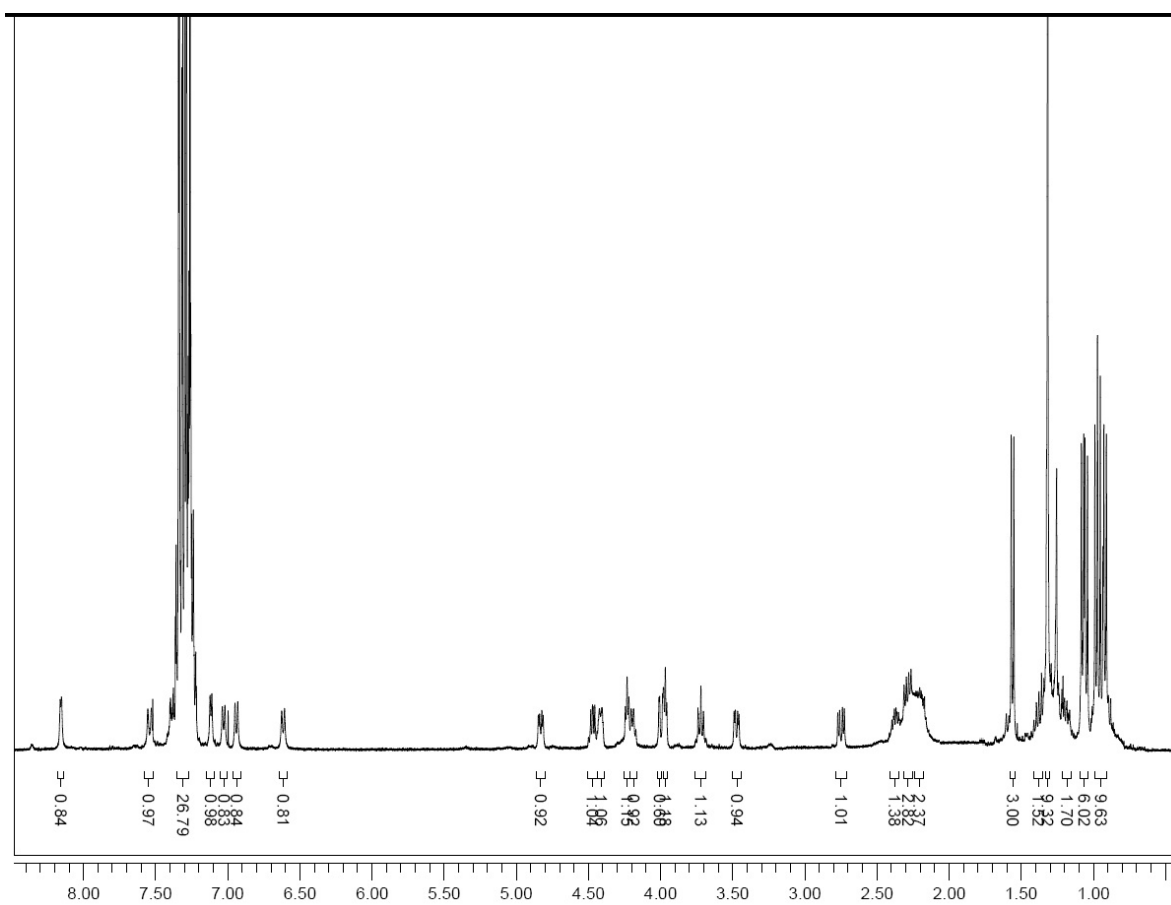



**$^{13}\text{C}$ -NMR Macrocycle 16**

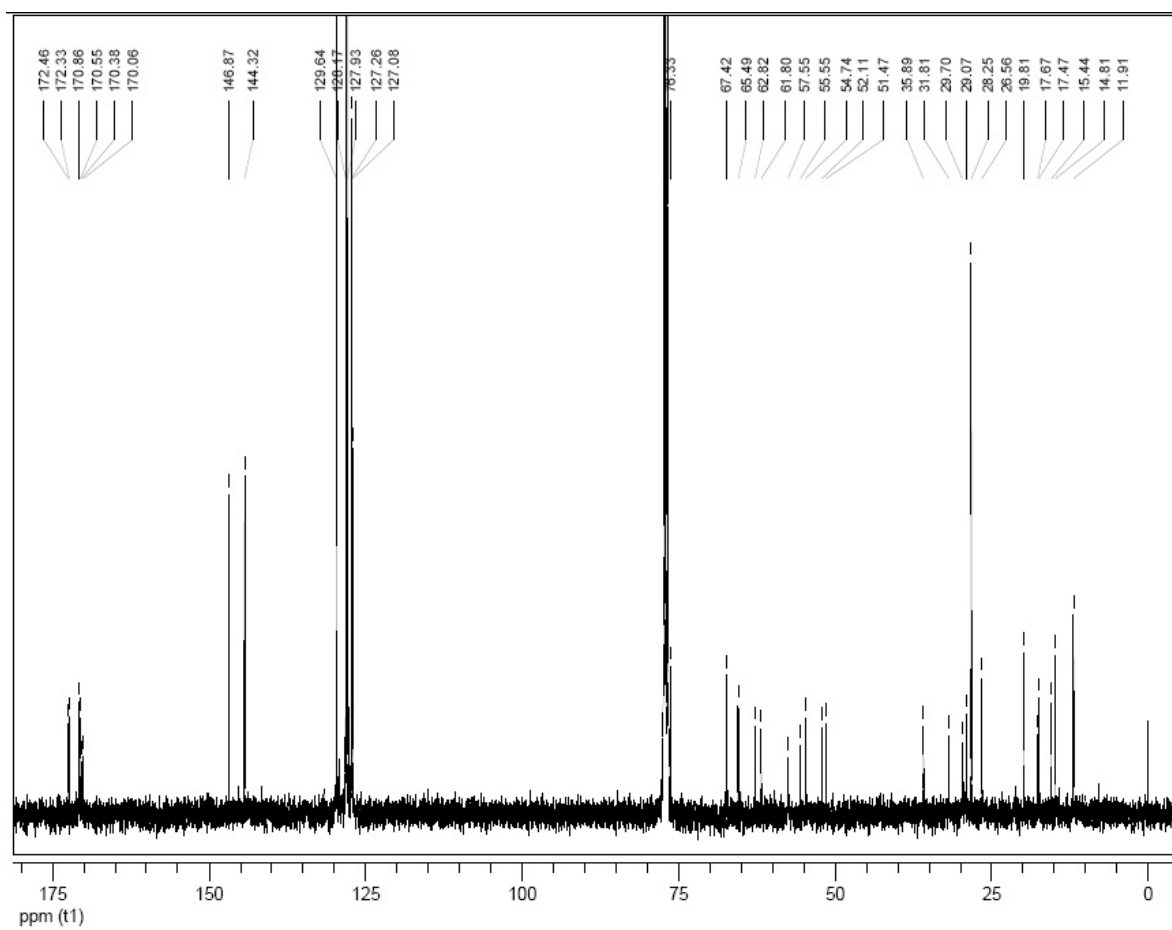

## HRMS – Macrocycle 16

### Generic Display Report (all)

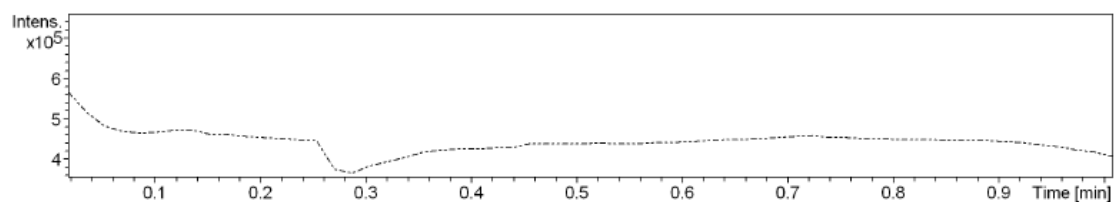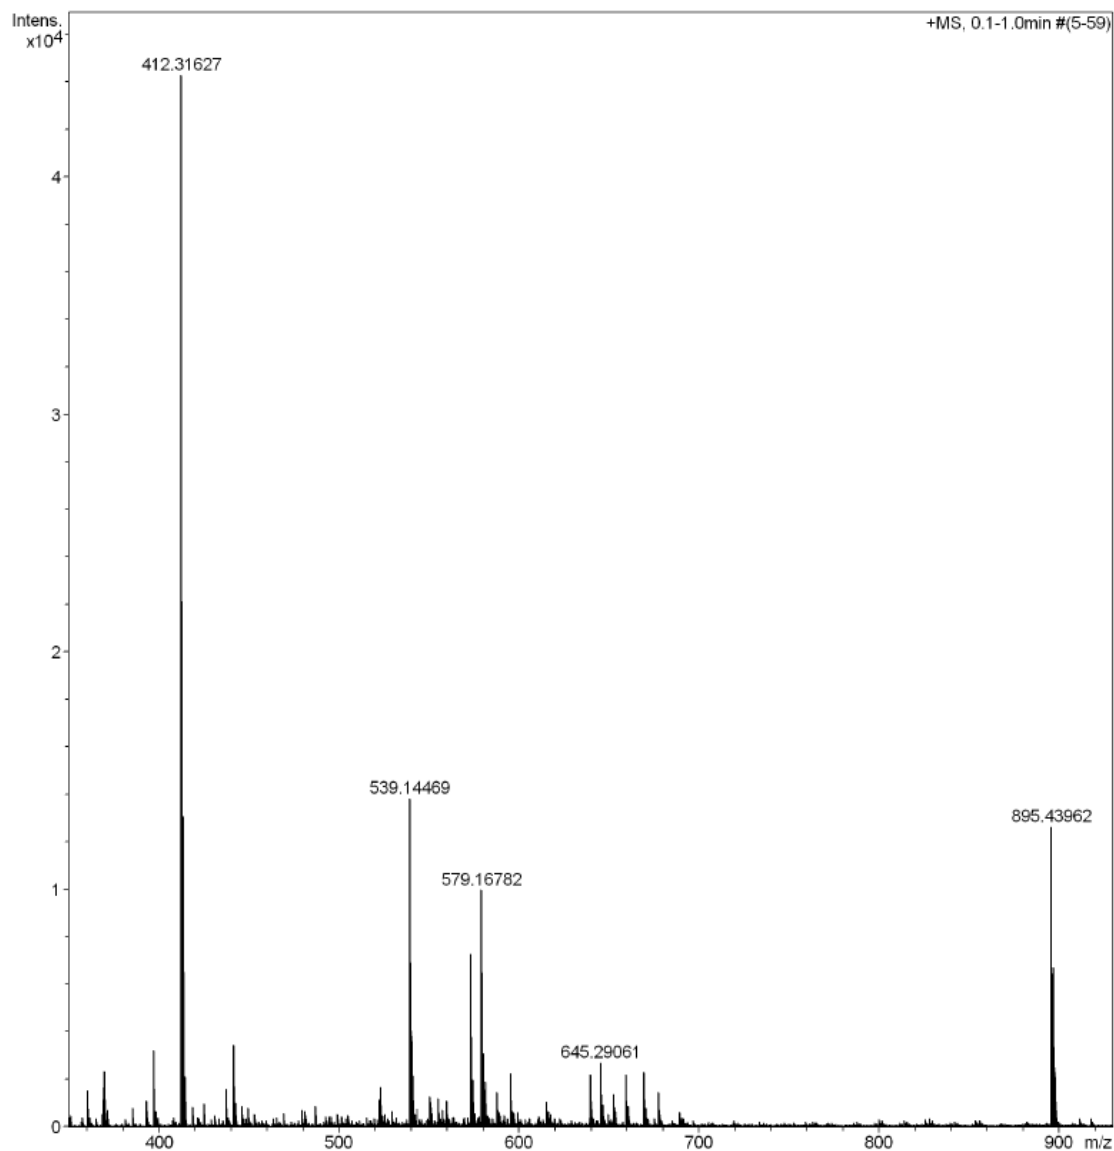

# IR – Macrocycle 16

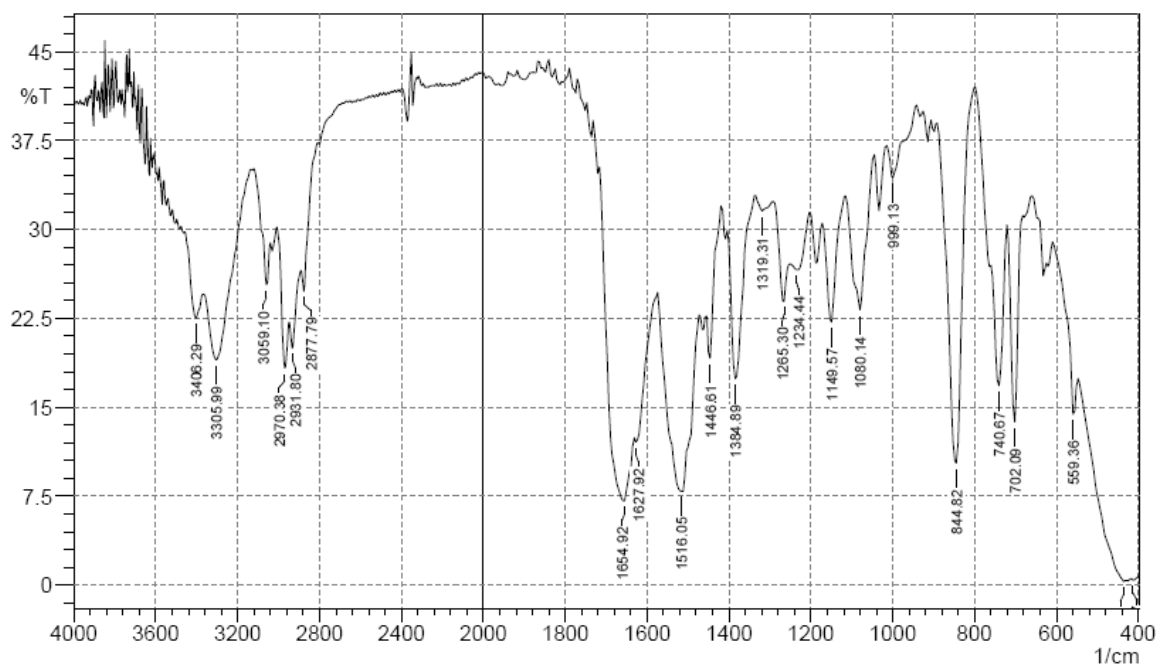

## HRMS Hexapeptide precursor of 17

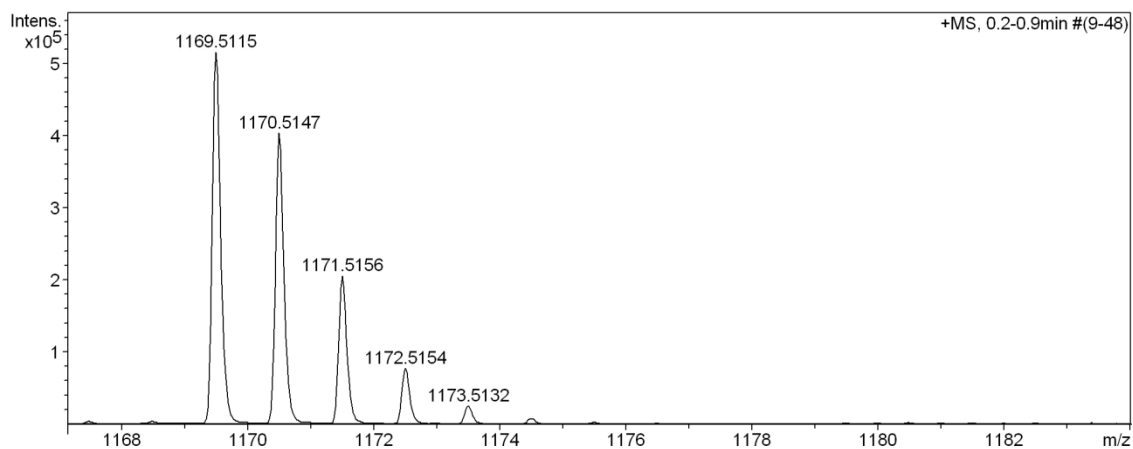

## <Cromatograma>

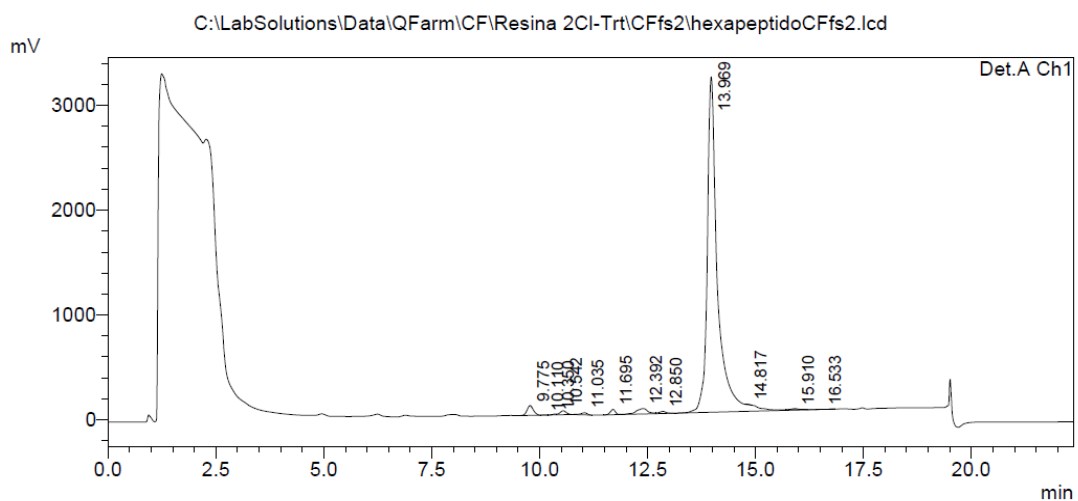

1 Det.A Ch1/220nm

PeakTable

Detector A Ch1 220nm

| Peak# | Name | Ret. Time | Area     | Height  | Area %  | Height % |
|-------|------|-----------|----------|---------|---------|----------|
| 1     |      | 9.775     | 961601   | 93636   | 1.699   | 2.678    |
| 2     |      | 10.110    | 12094    | 1733    | 0.021   | 0.050    |
| 3     |      | 10.350    | 50826    | 7114    | 0.090   | 0.204    |
| 4     |      | 10.542    | 369030   | 37209   | 0.652   | 1.064    |
| 5     |      | 11.035    | 197095   | 19535   | 0.348   | 0.559    |
| 6     |      | 11.695    | 409603   | 50851   | 0.724   | 1.455    |
| 7     |      | 12.392    | 970179   | 51566   | 1.714   | 1.475    |
| 8     |      | 12.850    | 226428   | 20465   | 0.400   | 0.585    |
| 9     |      | 13.969    | 53265459 | 3199643 | 94.087  | 91.526   |
| 10    |      | 14.817    | 16515    | 3240    | 0.029   | 0.093    |
| 11    |      | 15.910    | 124001   | 10000   | 0.219   | 0.286    |
| 12    |      | 16.533    | 10124    | 906     | 0.018   | 0.026    |
| Total |      |           | 56612955 | 3495898 | 100.000 | 100.000  |

**<sup>1</sup>H-NMR Macrocycle 17**

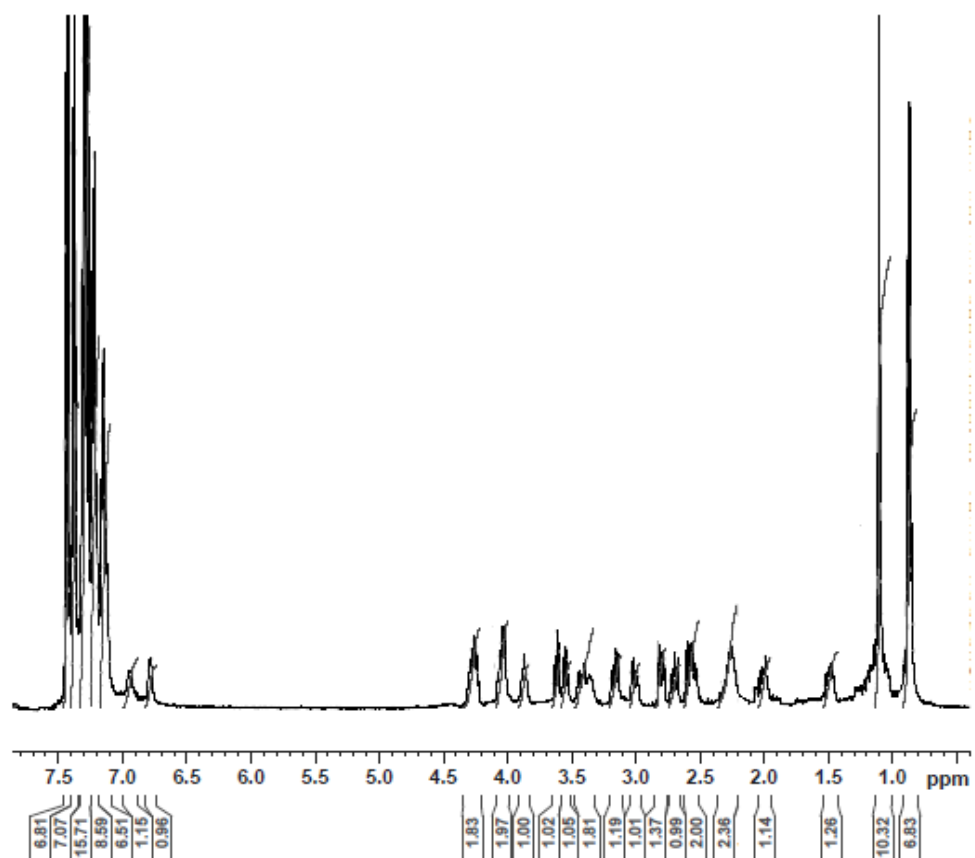

# **<sup>13</sup>C-NMR Macrocycle 17**

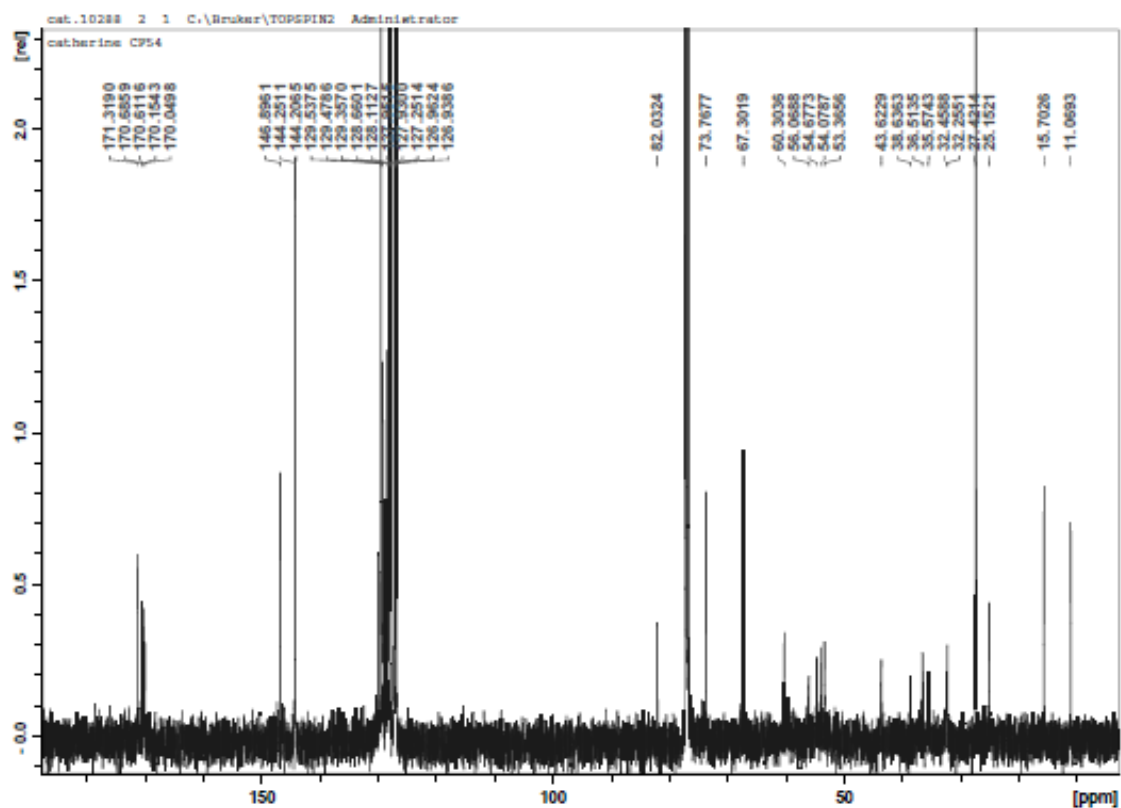

## **HRMS Macrocycle 17**

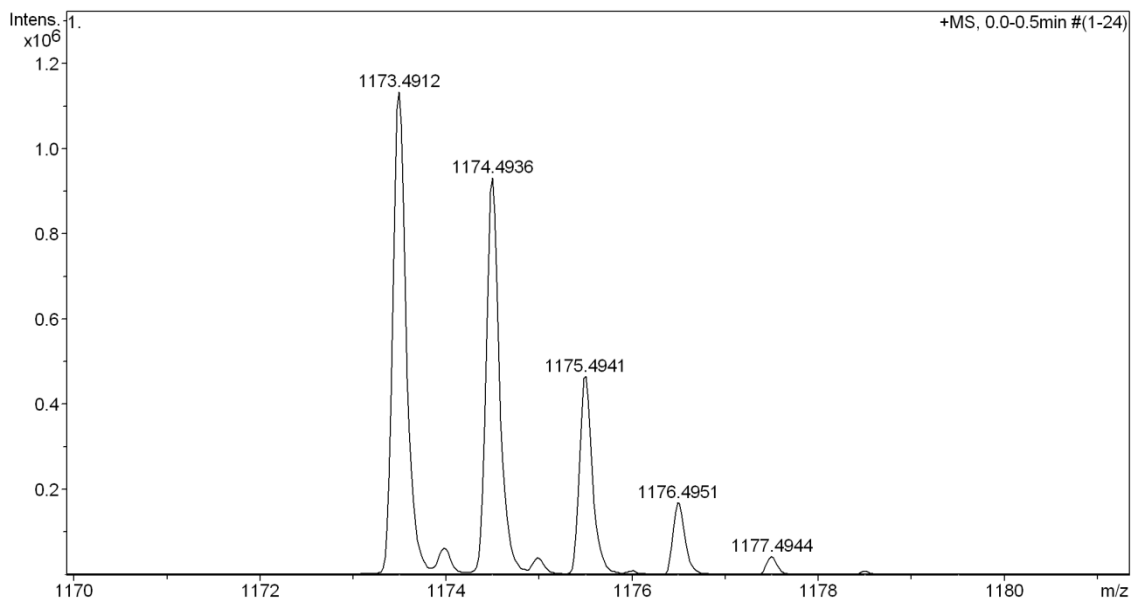

## IR Macrocycle 17

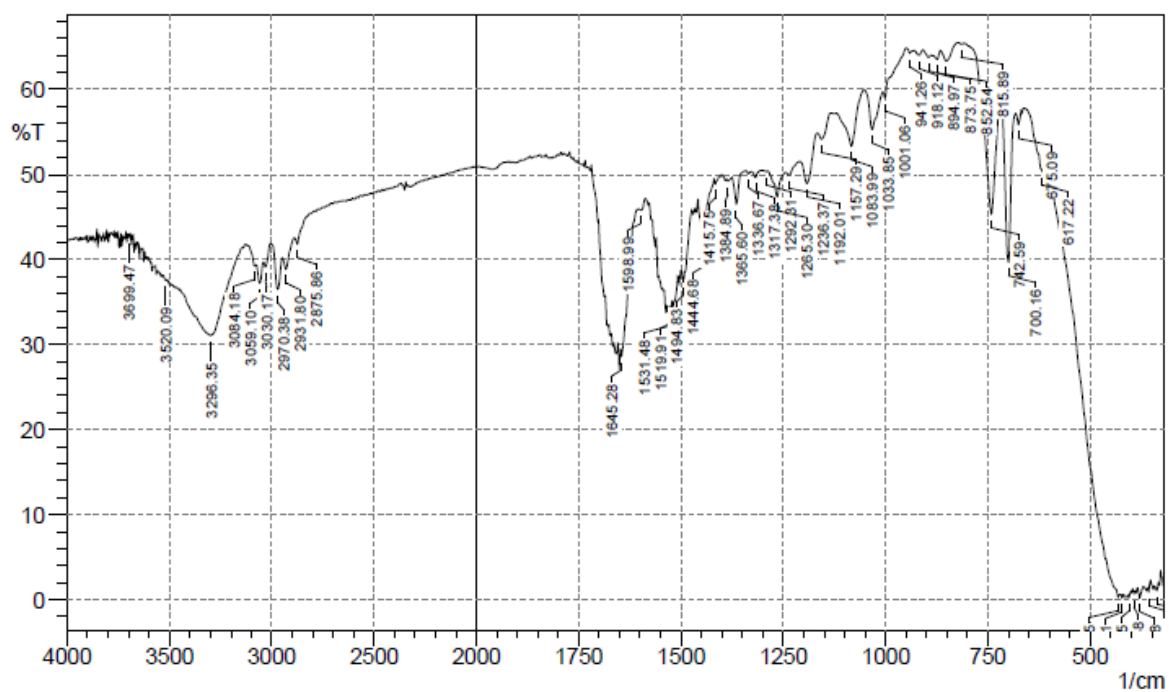

# HRMS Hexapeptide precursor of 18

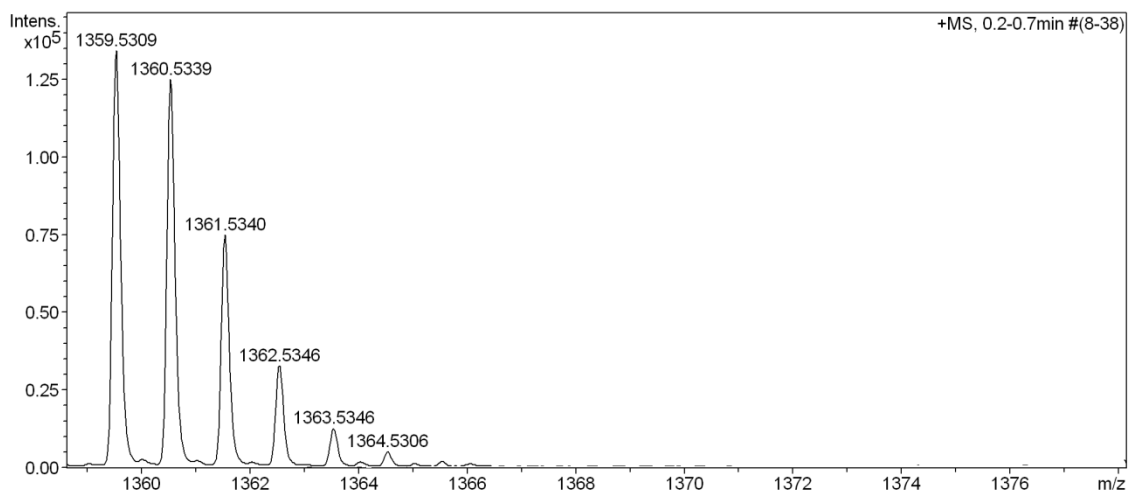

## <Cromatograma>

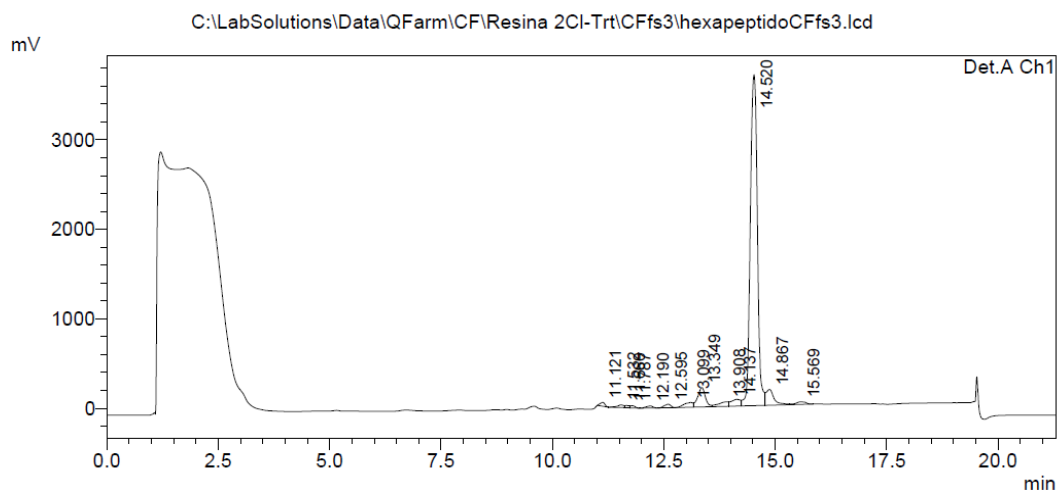

1 Det.A Ch1/220nm

PeakTable

Detector A Ch1 220nm

| Peak# | Name | Ret. Time | Area     | Height  | Area %  | Height % |
|-------|------|-----------|----------|---------|---------|----------|
| 1     |      | 11.121    | 310905   | 42465   | 0.619   | 0.946    |
| 2     |      | 11.532    | 309360   | 30393   | 0.615   | 0.677    |
| 3     |      | 11.660    | 176765   | 24772   | 0.352   | 0.552    |
| 4     |      | 11.787    | 172274   | 24313   | 0.343   | 0.542    |
| 5     |      | 12.190    | 248240   | 23380   | 0.494   | 0.521    |
| 6     |      | 12.595    | 404787   | 39841   | 0.805   | 0.888    |
| 7     |      | 13.099    | 759445   | 53533   | 1.511   | 1.193    |
| 8     |      | 13.349    | 2560018  | 217768  | 5.093   | 4.853    |
| 9     |      | 13.908    | 795801   | 50060   | 1.583   | 1.116    |
| 10    |      | 14.137    | 1097192  | 75267   | 2.183   | 1.677    |
| 11    |      | 14.520    | 40779357 | 3699081 | 81.130  | 82.432   |
| 12    |      | 14.867    | 2186197  | 176302  | 4.349   | 3.929    |
| 13    |      | 15.569    | 463876   | 30262   | 0.923   | 0.674    |
| Total |      |           | 50264218 | 4487439 | 100.000 | 100.000  |



**<sup>1</sup>H-NMR Macrocycle 18**

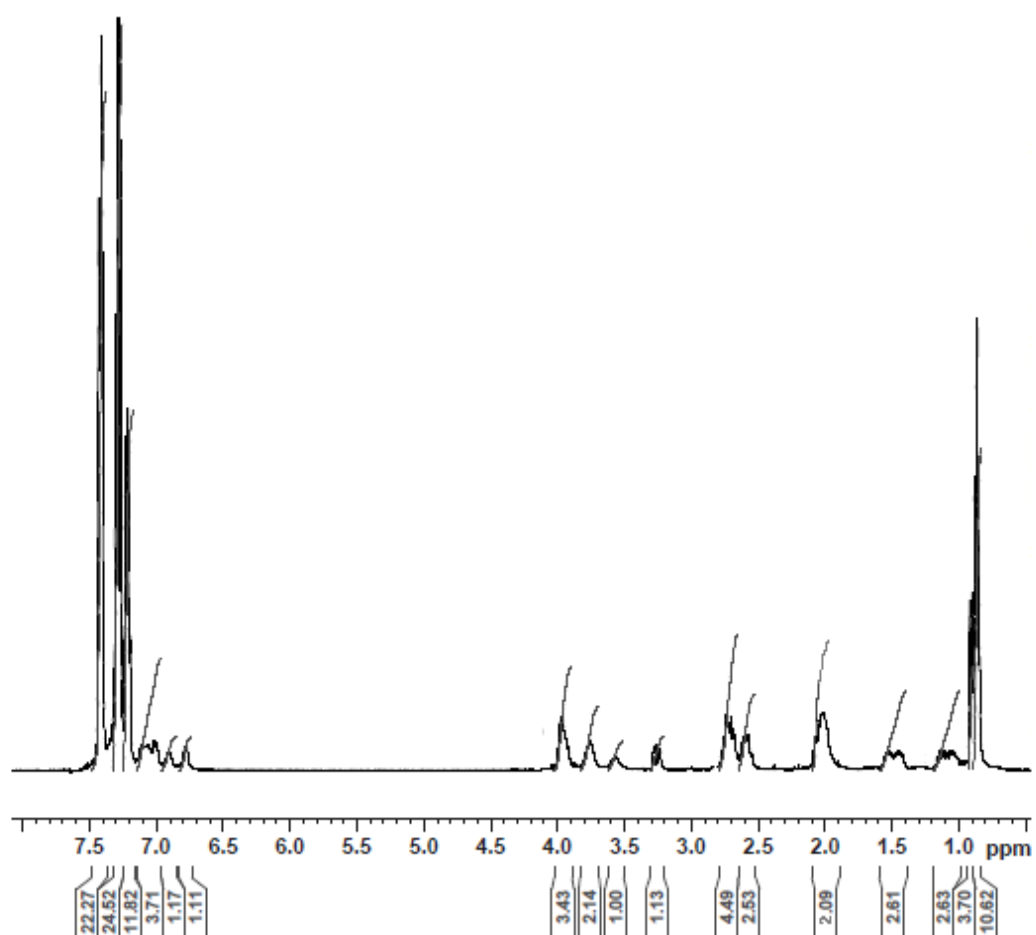

# **<sup>13</sup>C-NMR Macrocycle 18**

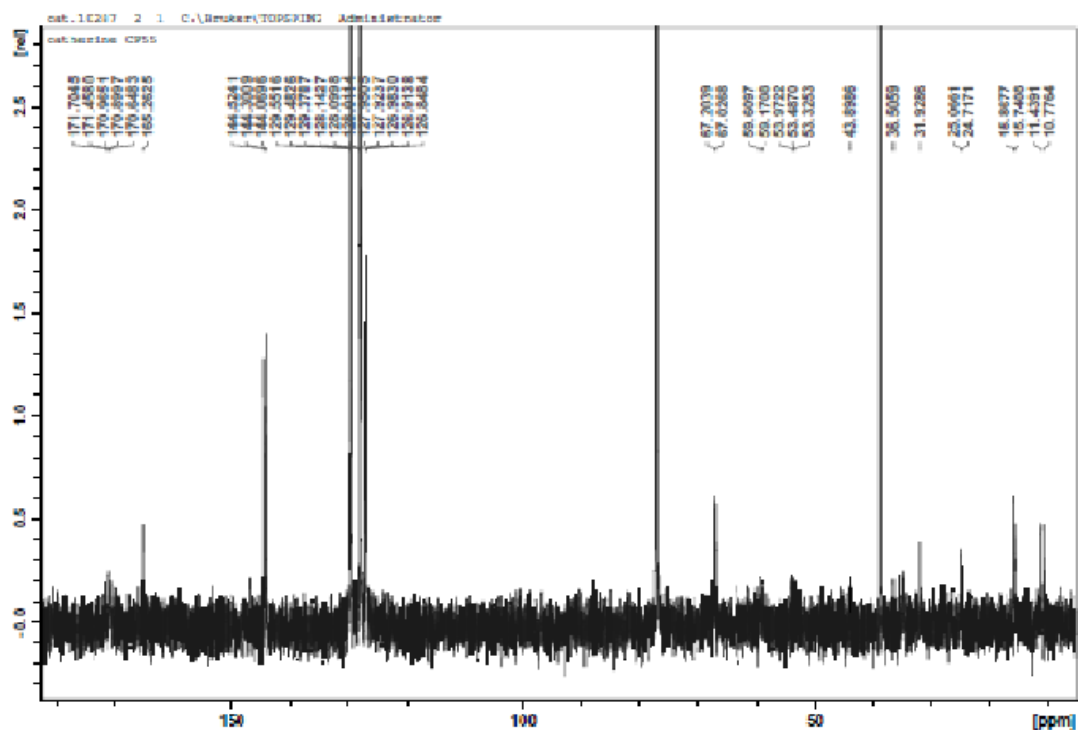

# **HRMS Macrocycle 18**

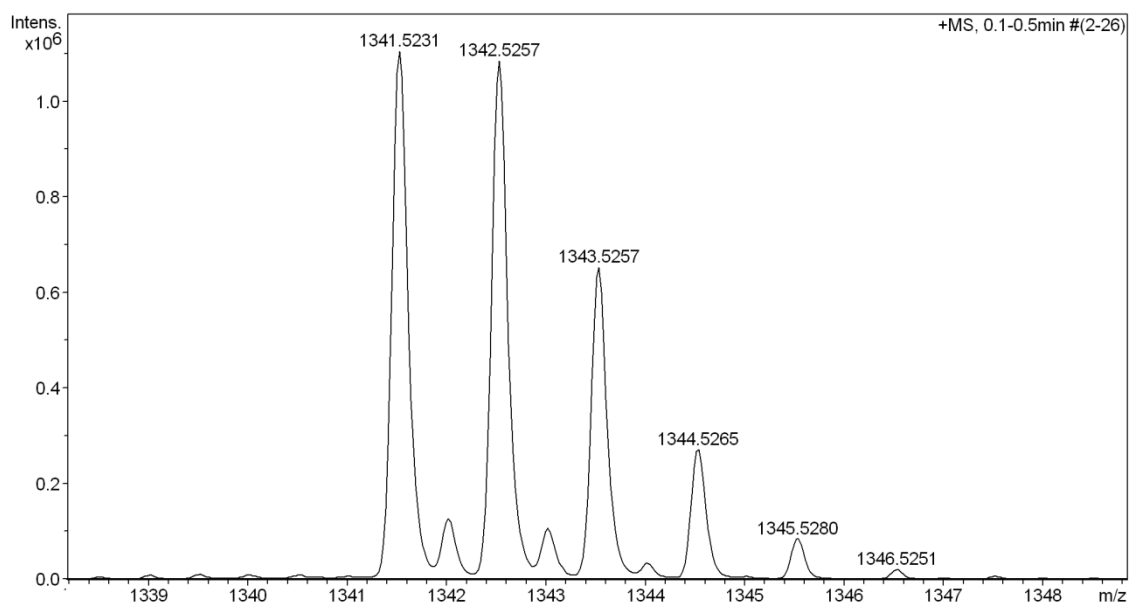

# IR Macrocycle 18

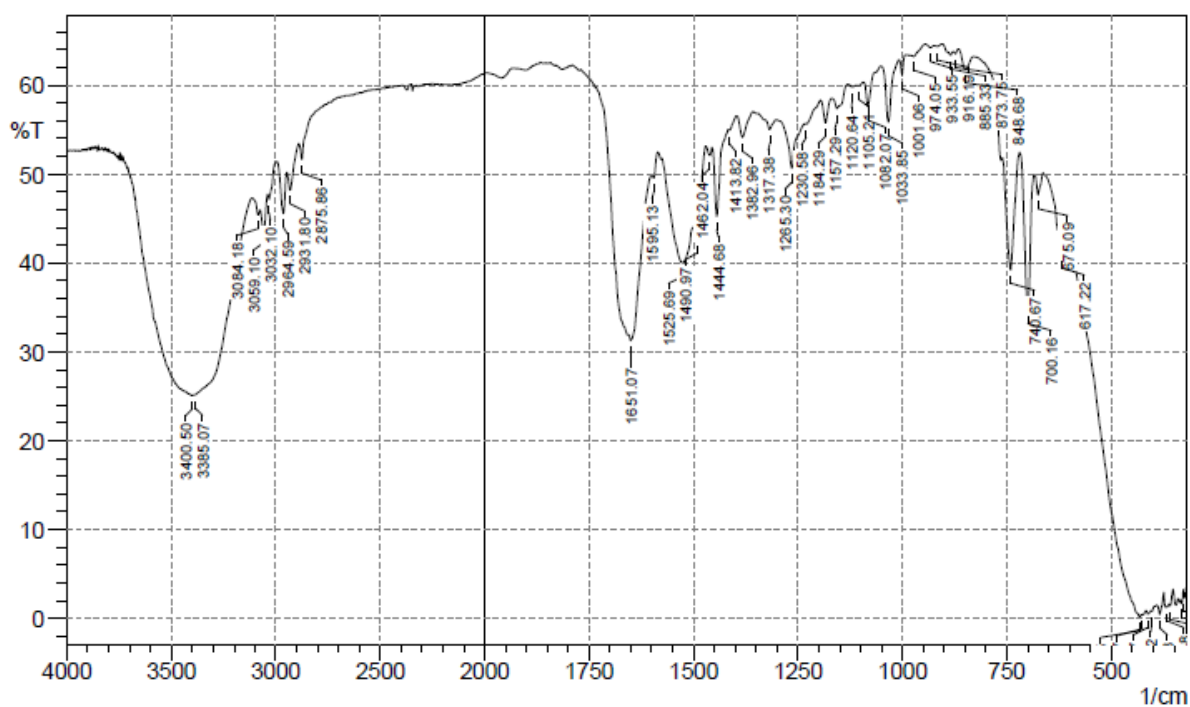

## HRMS Hexapeptide precursor of 19

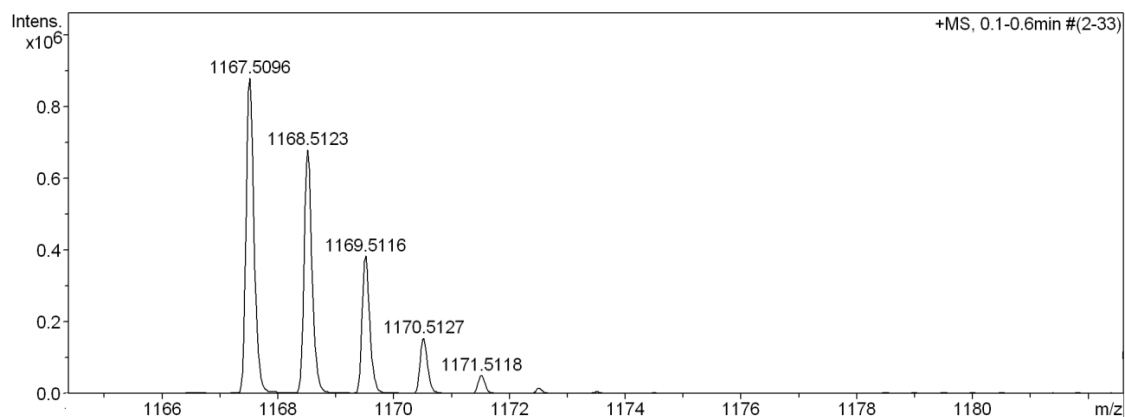

## <Cromatograma>

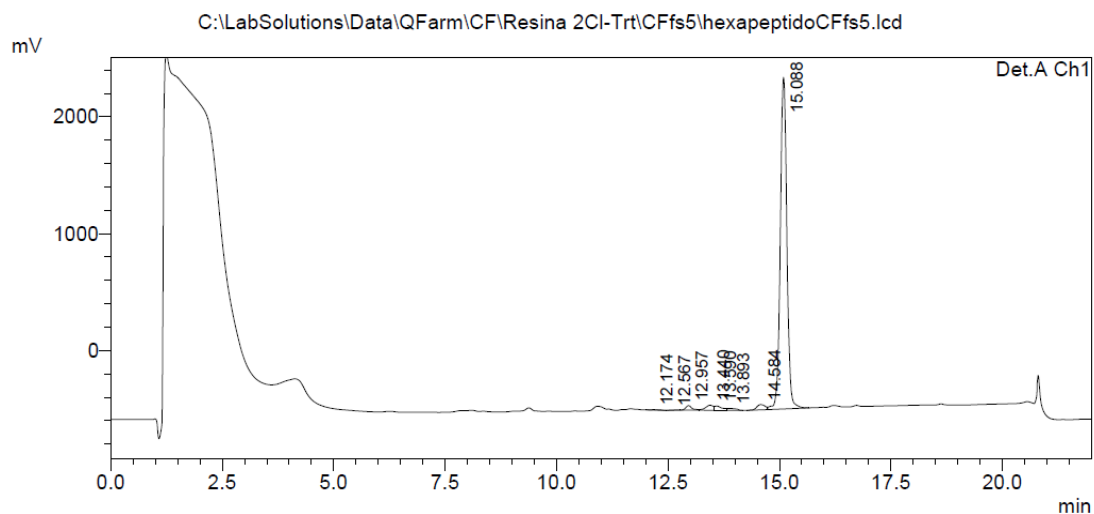

1 Det.A Ch1/220nm

PeakTable

Detector A Ch1 220nm

| Peak# | Name | Ret. Time | Area     | Height  | Area %  | Height % |
|-------|------|-----------|----------|---------|---------|----------|
| 1     |      | 12.174    | 56053    | 3618    | 0.179   | 0.120    |
| 2     |      | 12.567    | 10761    | 1424    | 0.034   | 0.047    |
| 3     |      | 12.957    | 374190   | 39441   | 1.197   | 1.305    |
| 4     |      | 13.440    | 536313   | 43166   | 1.716   | 1.429    |
| 5     |      | 13.590    | 421540   | 36186   | 1.349   | 1.198    |
| 6     |      | 13.893    | 223347   | 16737   | 0.715   | 0.554    |
| 7     |      | 14.584    | 587317   | 45111   | 1.880   | 1.493    |
| 8     |      | 15.088    | 29038431 | 2835939 | 92.929  | 93.855   |
| Total |      |           | 31247952 | 3021622 | 100.000 | 100.000  |

**<sup>1</sup>H-NMR Macrocycle 19**

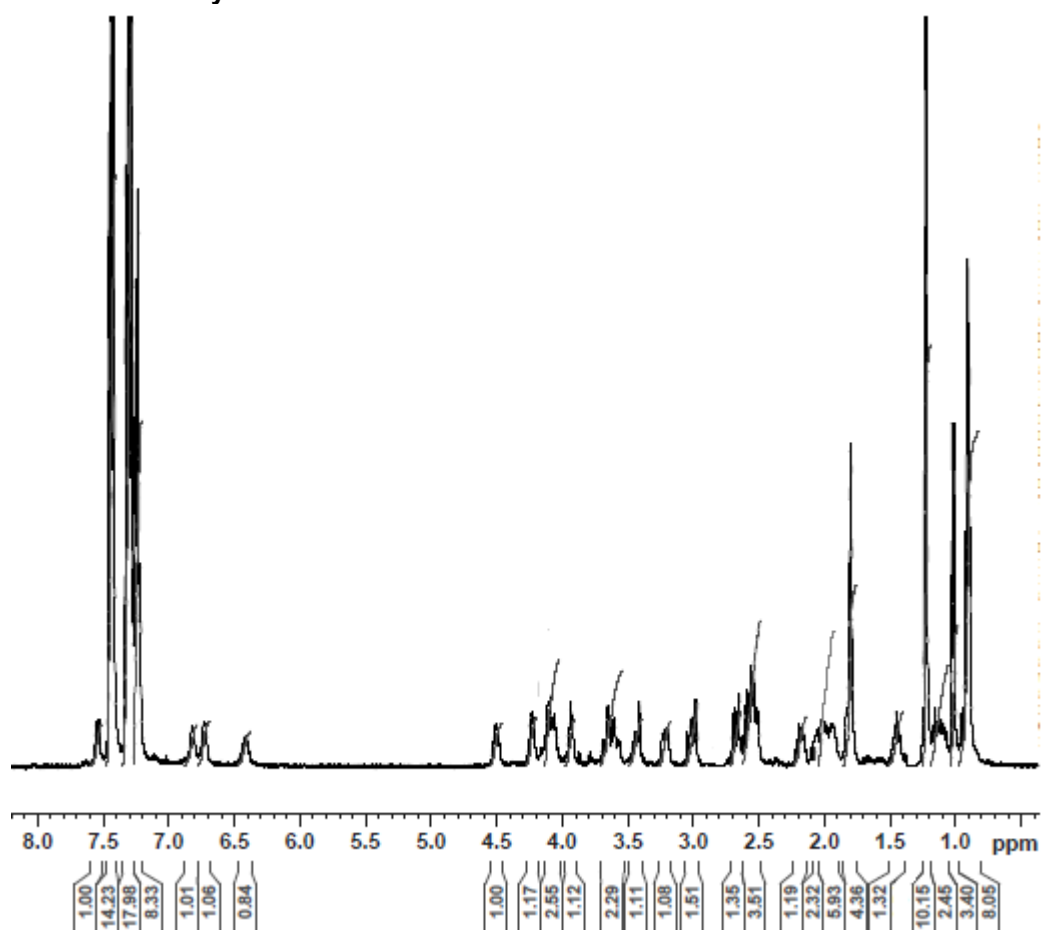

# **<sup>13</sup>C-NMR Macrocycle 19**

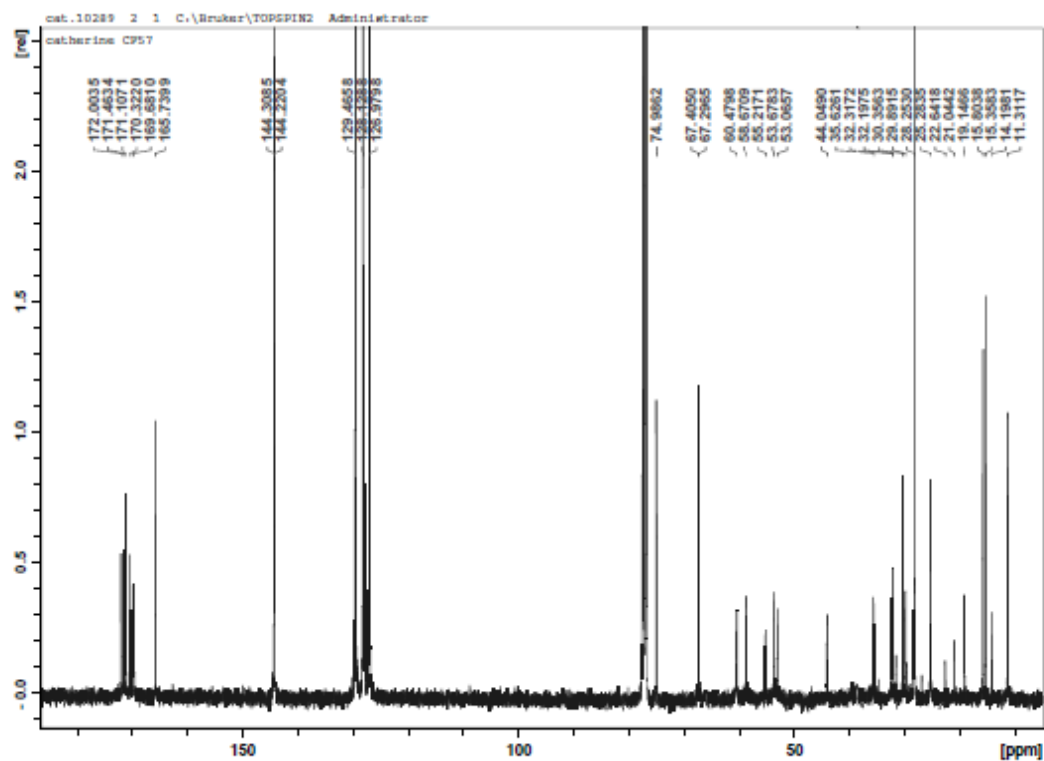

## **HRMS Macrocycle 19**

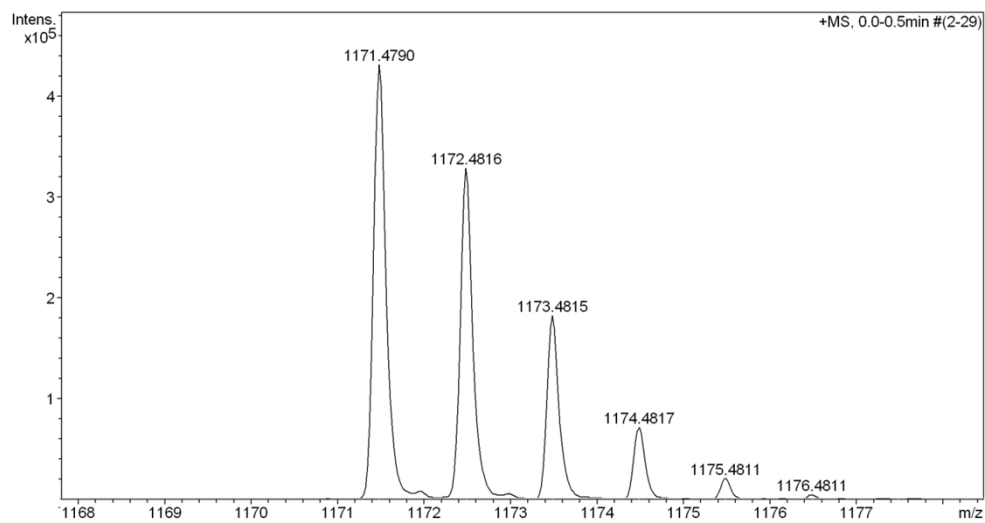

# IR Macrocycle 19

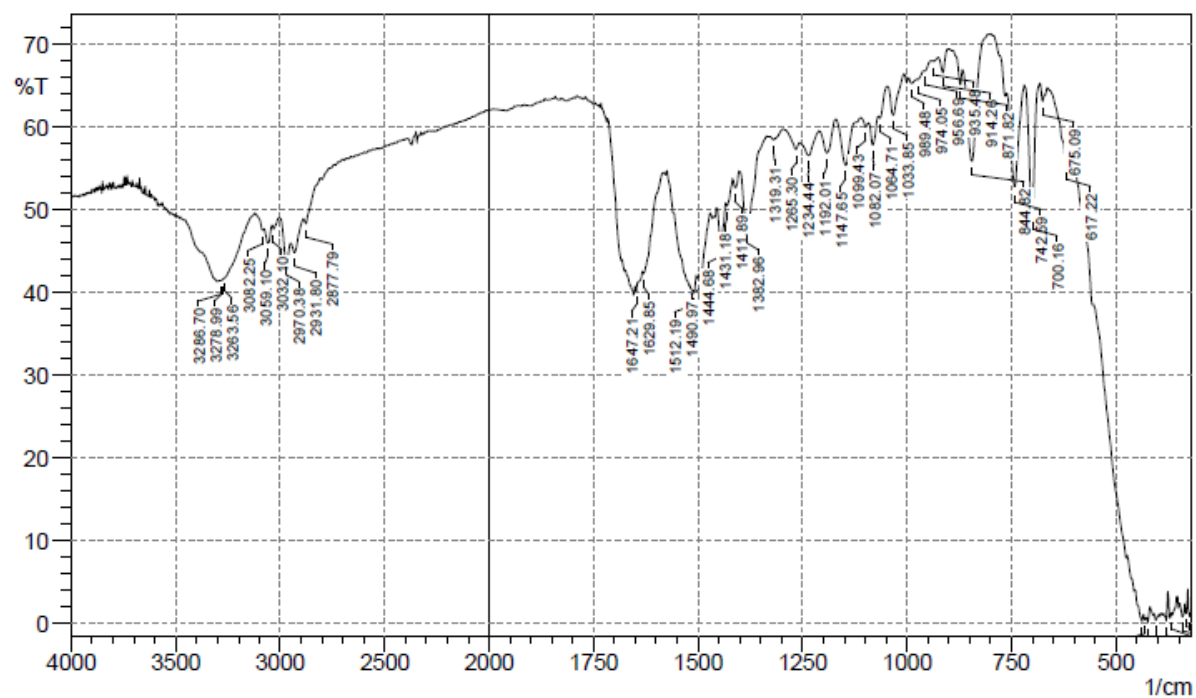

# HRMS –Hexapeptide precursor of 20

C:\Xcalibur\...110718\_SP-A\_1

7/18/2011 10:22:21 AM

110718\_SP-A\_1

H2O:ACN

110718\_SP-A\_1 #1 RT: 80.63 AV: 1 NL: 1.11E7

T: FTMS + p NSI Full ms [100.00-2000.00]

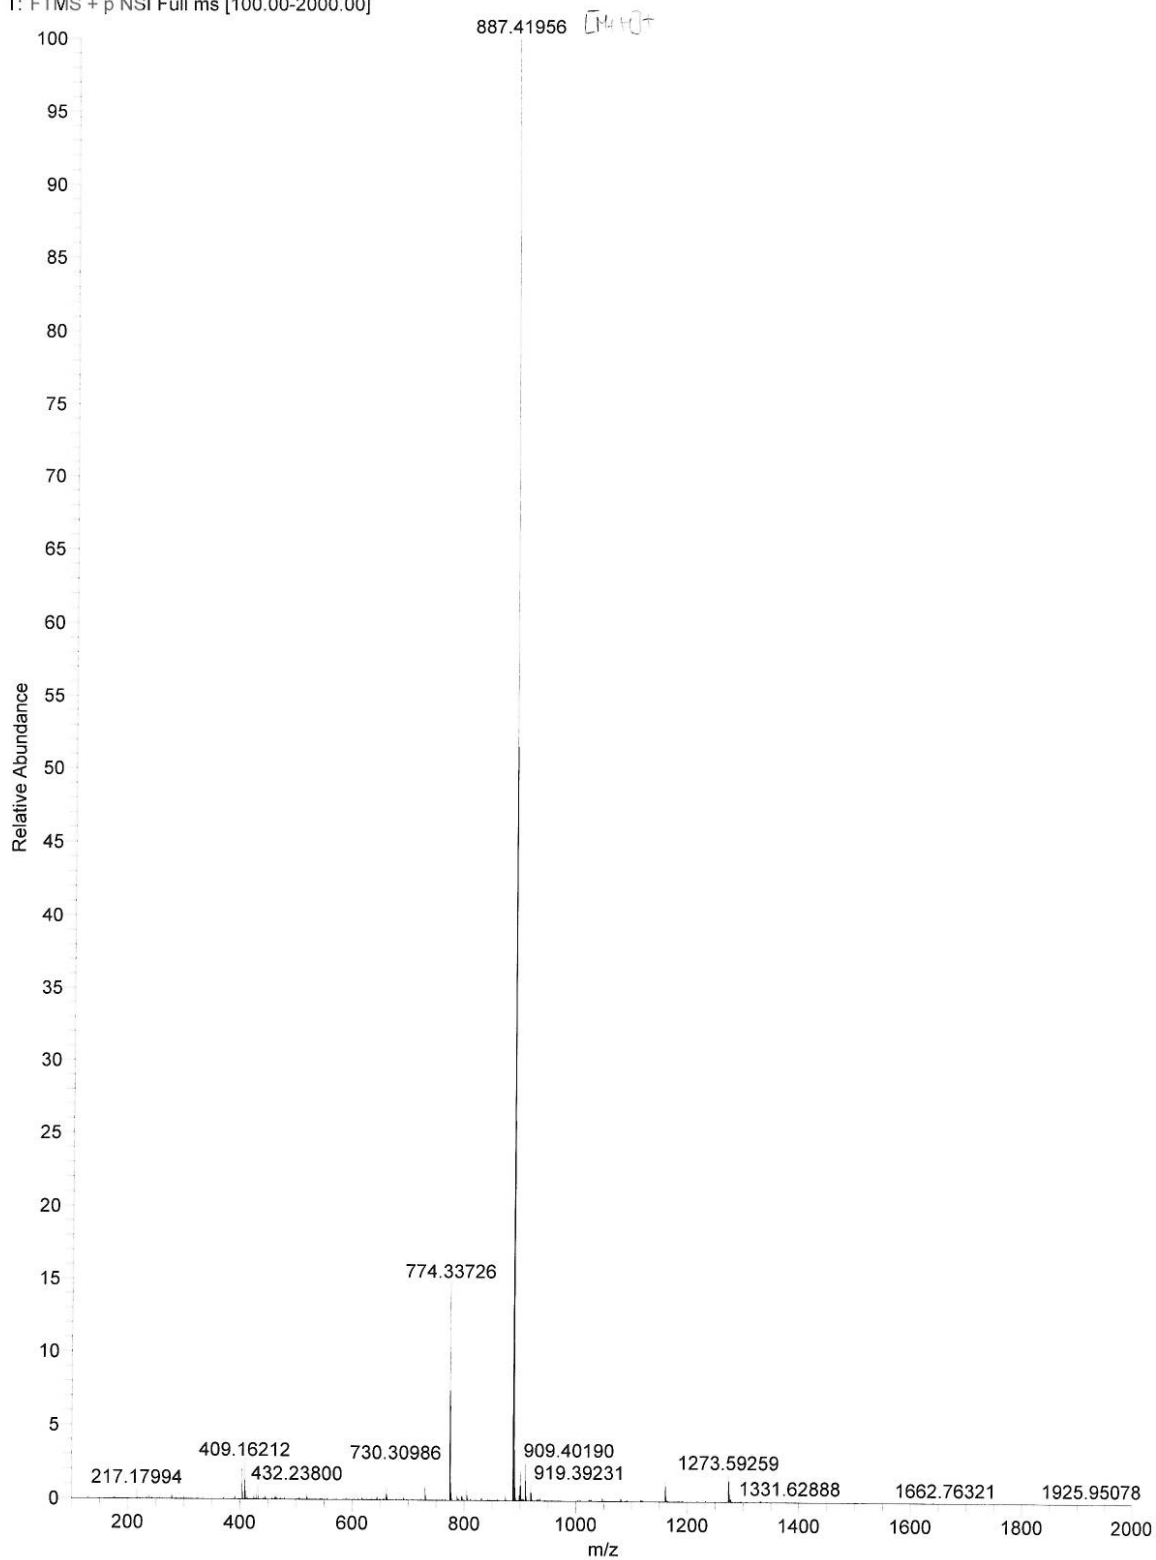



## HPLC – Hexapeptide precursor of 20

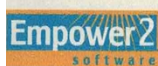

Default

### SAMPLE INFORMATION

|                   |                            |                     |              |
|-------------------|----------------------------|---------------------|--------------|
| Sample Name:      | SP_A g50100 escalado final | Acquired By:        | System       |
| Sample Type:      | Unknown                    | Sample Set Name:    | 11072011     |
| Vial:             | 76                         | Acq. Method Set:    | A50100t8Tamb |
| Injection #:      | 1                          | Processing Method:  | STE          |
| Injection Volume: | 20.00 ul                   | Channel Name:       | 220.0nm      |
| Run Time:         | 11.0 Minutes               | Proc. Chnl. Descr.: | PDA 220.0 nm |
| Date Acquired:    | 7/11/2011 3:12:32 PM CEST  |                     |              |
| Date Processed:   | 7/11/2011 4:02:12 PM CEST  |                     |              |

### Auto-Scaled Chromatogram

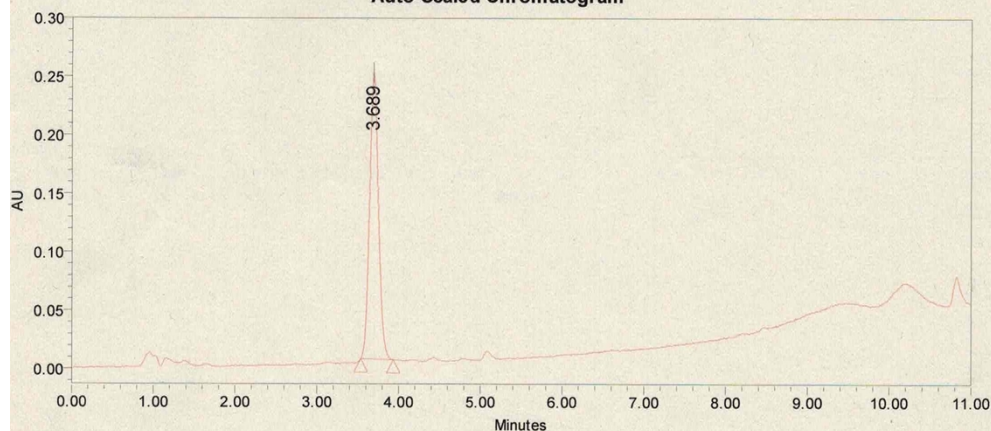

### Peak Results

|   | RT    | Area    | Height | Total Area | % Area |
|---|-------|---------|--------|------------|--------|
| 1 | 3.689 | 1887481 | 244889 | 1887481    | 100.00 |

Reported by User: System  
Report Method: Default  
Report Method ID: 1309  
Page: 1 of 2

Project Name: Juliol\_2011  
Date Printed:  
7/11/2011  
5:05:11 PM Europe/Madrid

**<sup>1</sup>H-NMR Macrocycle 20**

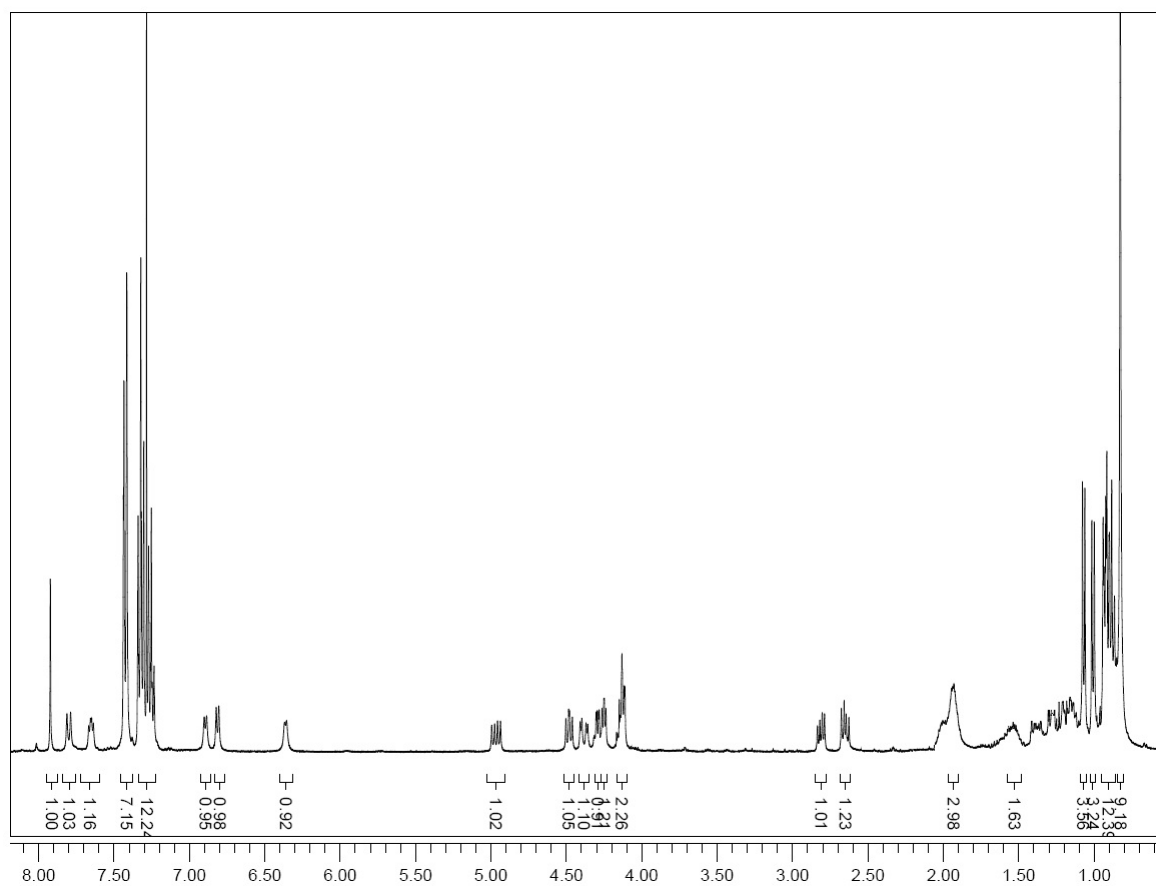

**$^{13}\text{C}$ -NMR Macrocycle 20**

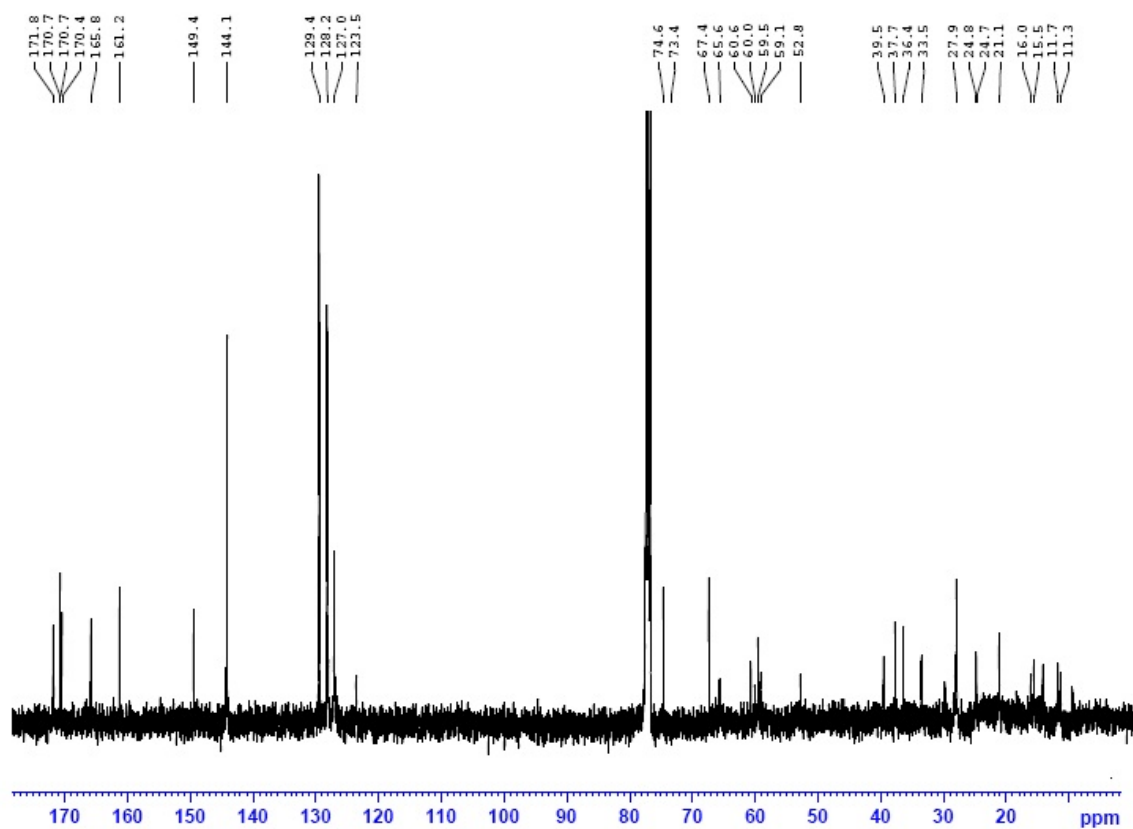

## HRMS – Macrocycle 20

### Generic Display Report (all)

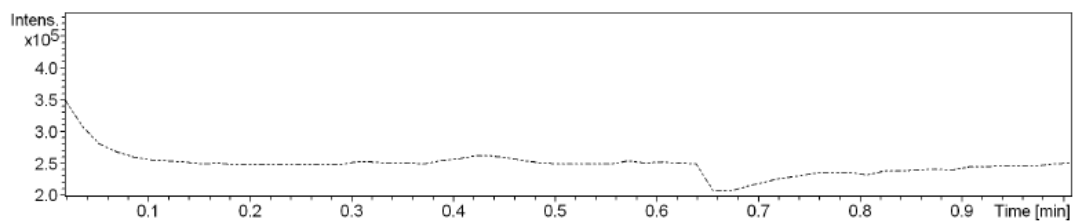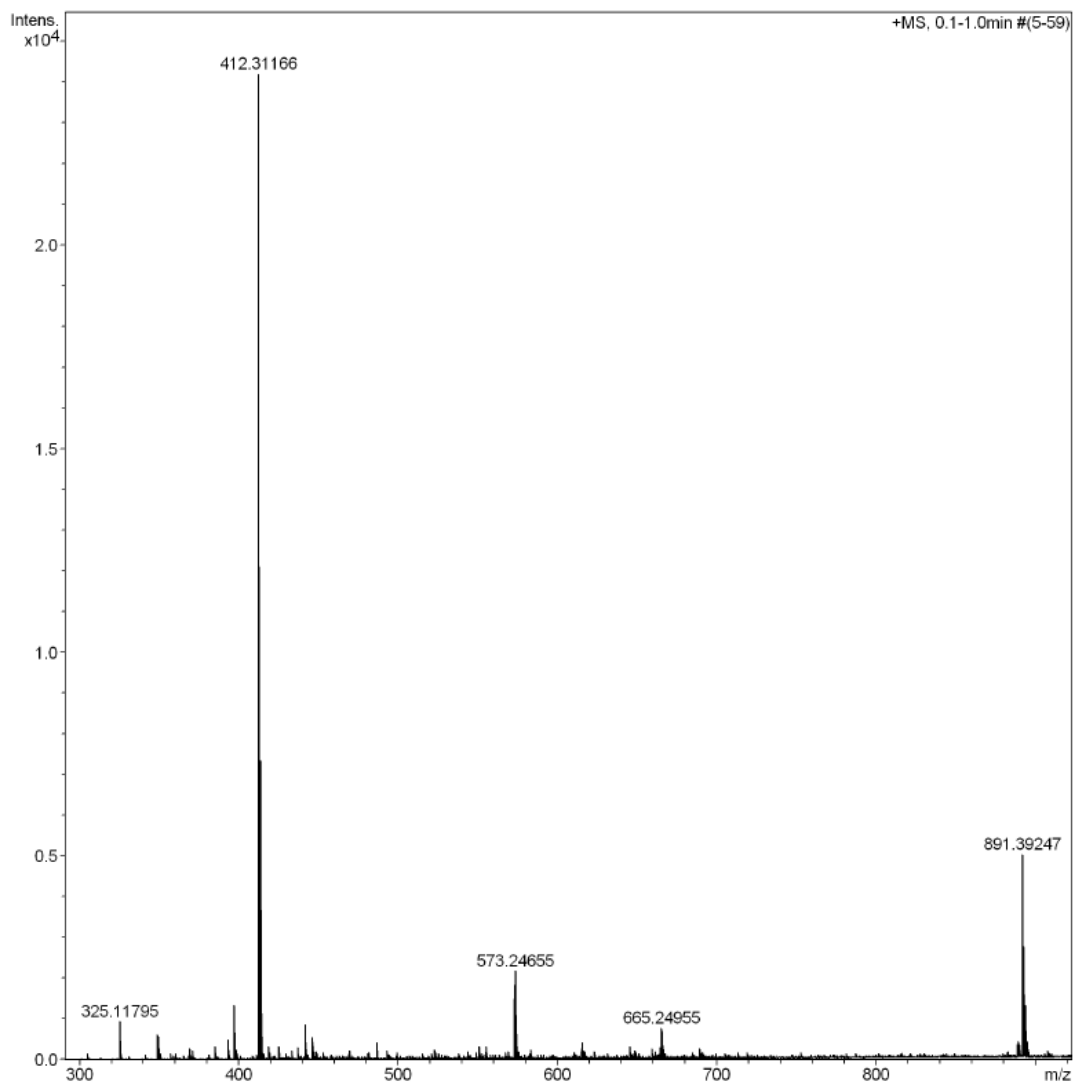

# IR – Macrocycle 20

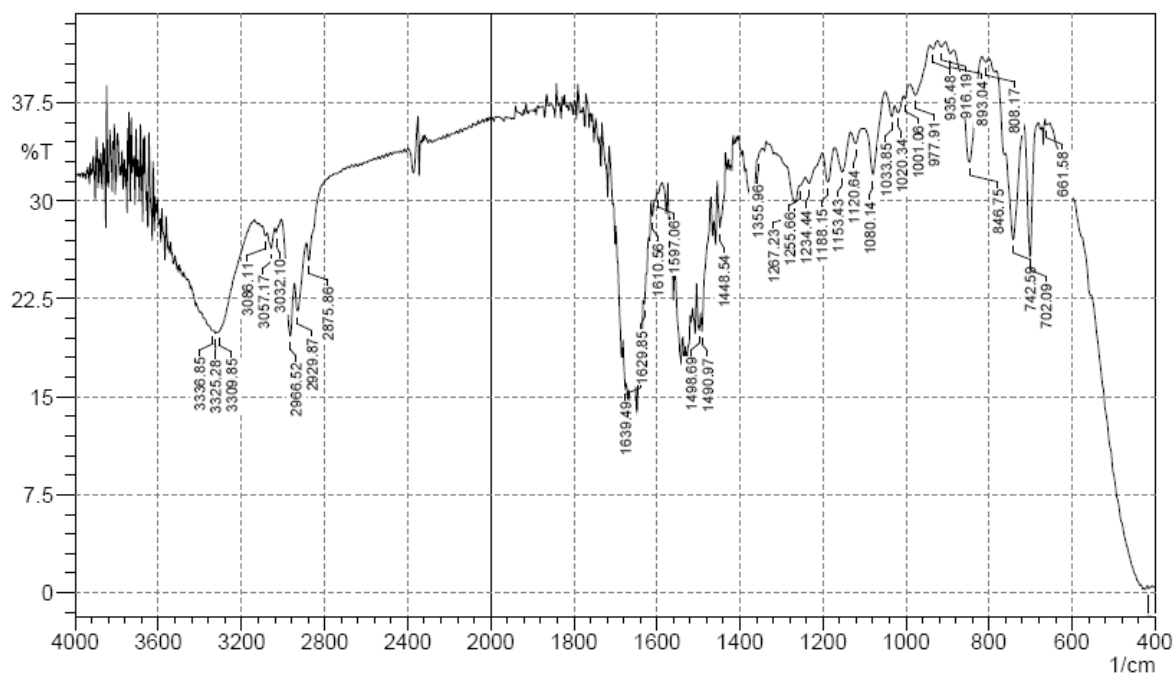

# HRMS - Hexapeptide precursor 2o

\\Xcalibur\\...\\110718\_SP-D\_1

7/18/2011 10:24:33 AM

110718\_SP-D\_1

I2O:ACN

10718\_SP-D\_1 #1 RT: 82.81 AV: 1 NL: 5.80E6

FTMS + p NSI Full ms [100.00-2000.00]

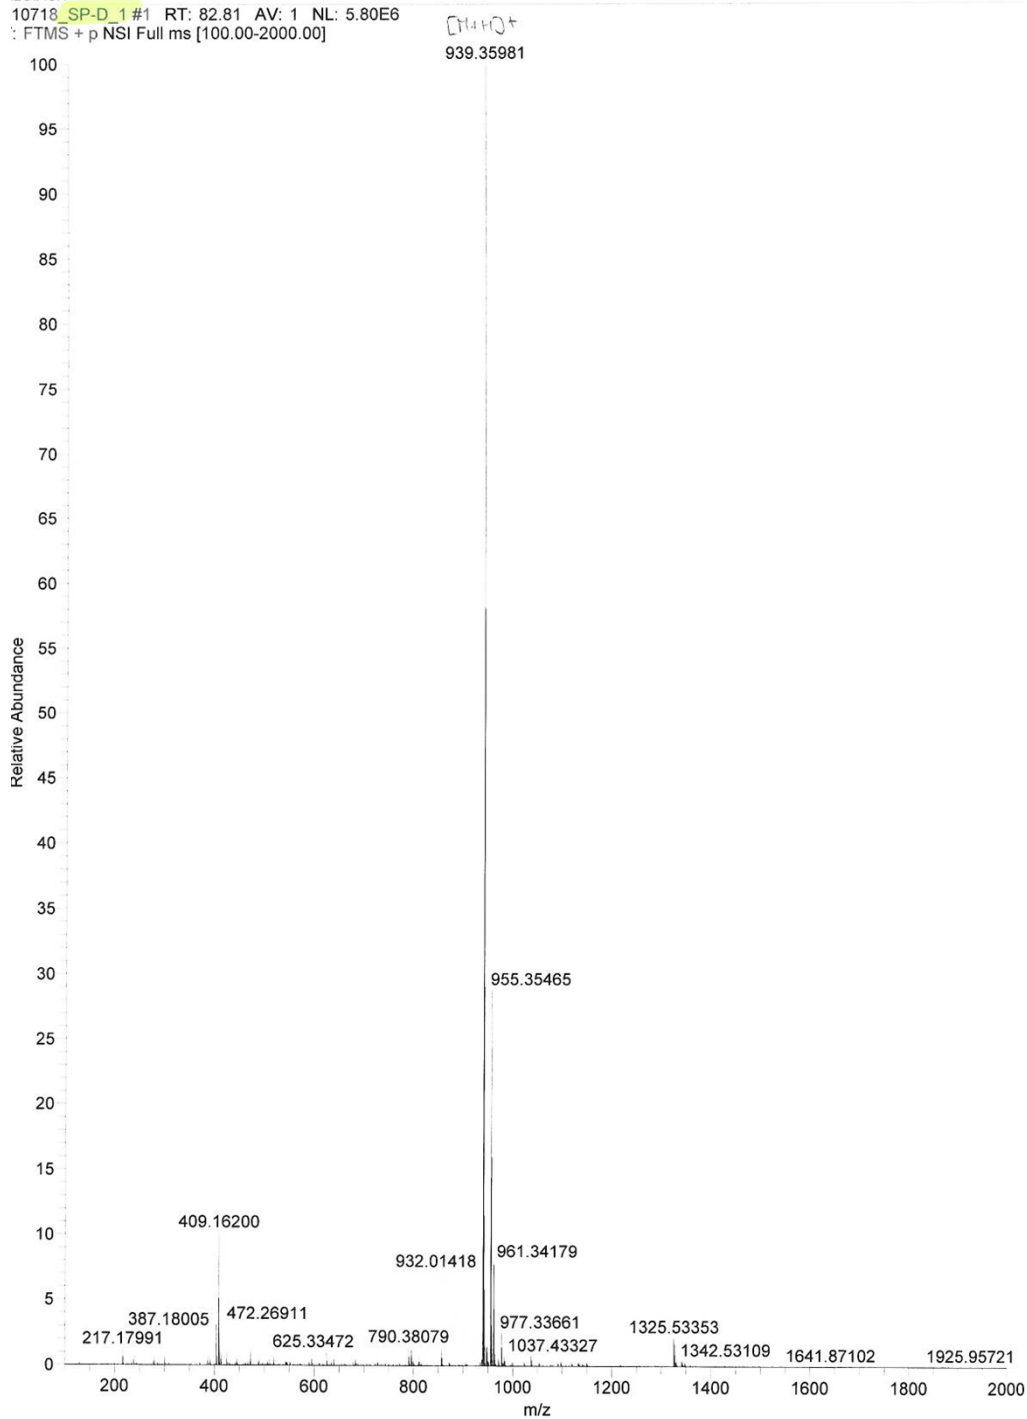

## HPLC – Hexapeptide precursor of 21

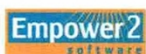

Default

### SAMPLE INFORMATION

|                   |                            |                     |              |
|-------------------|----------------------------|---------------------|--------------|
| Sample Name:      | SP_D g4090                 | Acquired By:        | System       |
| Sample Type:      | Unknown                    | Sample Set Name:    | 110711       |
| Vial:             | 82                         | Acq. Method Set:    | A4090t8Tamb  |
| Injection #:      | 1                          | Processing Method:  | ste          |
| Injection Volume: | 30.00 ul                   | Channel Name:       | 220.0nm      |
| Run Time:         | 11.0 Minutes               | Proc. Chnl. Descr.: | PDA 220.0 nm |
| Date Acquired:    | 7/11/2011 6:43:06 PM CEST  |                     |              |
| Date Processed:   | 7/12/2011 12:23:13 PM CEST |                     |              |

### Auto-Scaled Chromatogram

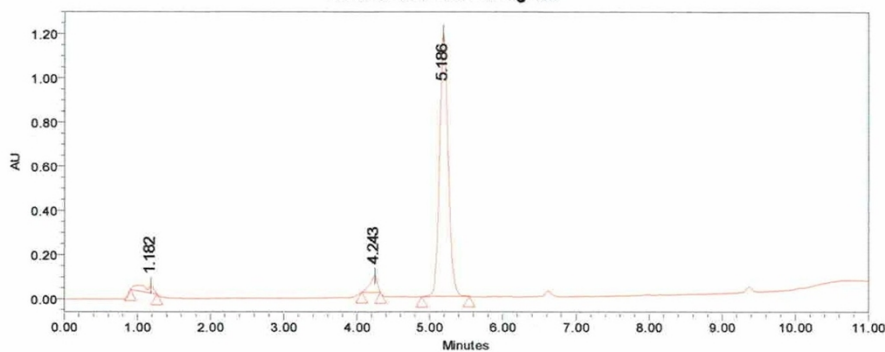

### Peak Results

|   | RT    | Area    | Height  | Total Area | % Area |
|---|-------|---------|---------|------------|--------|
| 1 | 1.182 | 441480  | 35089   | 10738355   | 4.11   |
| 2 | 4.243 | 540237  | 76398   | 10738355   | 5.03   |
| 3 | 5.186 | 9756638 | 1189291 | 10738355   | 90.86  |

Reported by User: System  
 Report Method: Default  
 Report Method ID: 1567  
 Page: 1 of 2

Project Name: Julio\_2011  
 Date Printed:  
 7/12/2011  
 12:47:56 PM Europe/Madrid

**<sup>1</sup>H-NMR – Macrocycle 21**

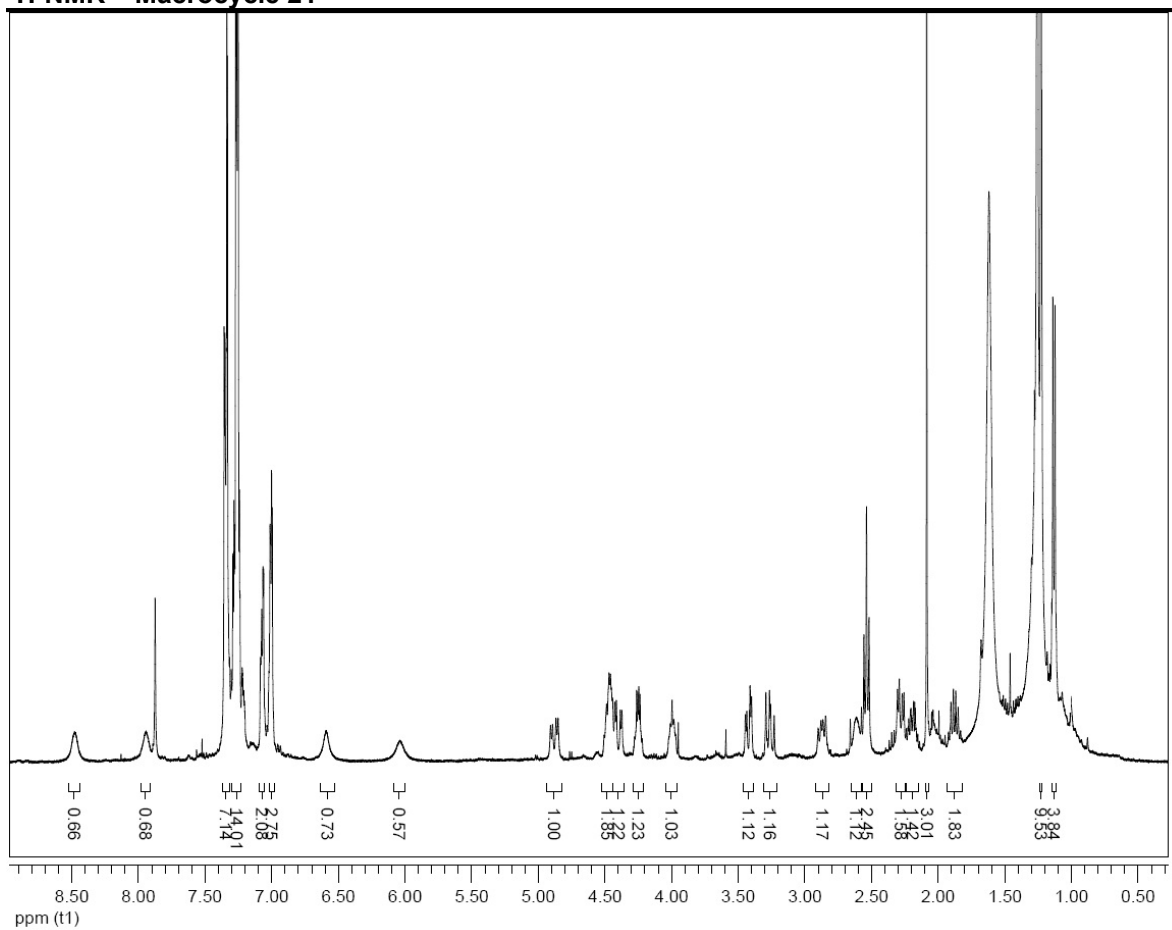



**$^{13}\text{C}$ -NMR – Macrocycle 21**

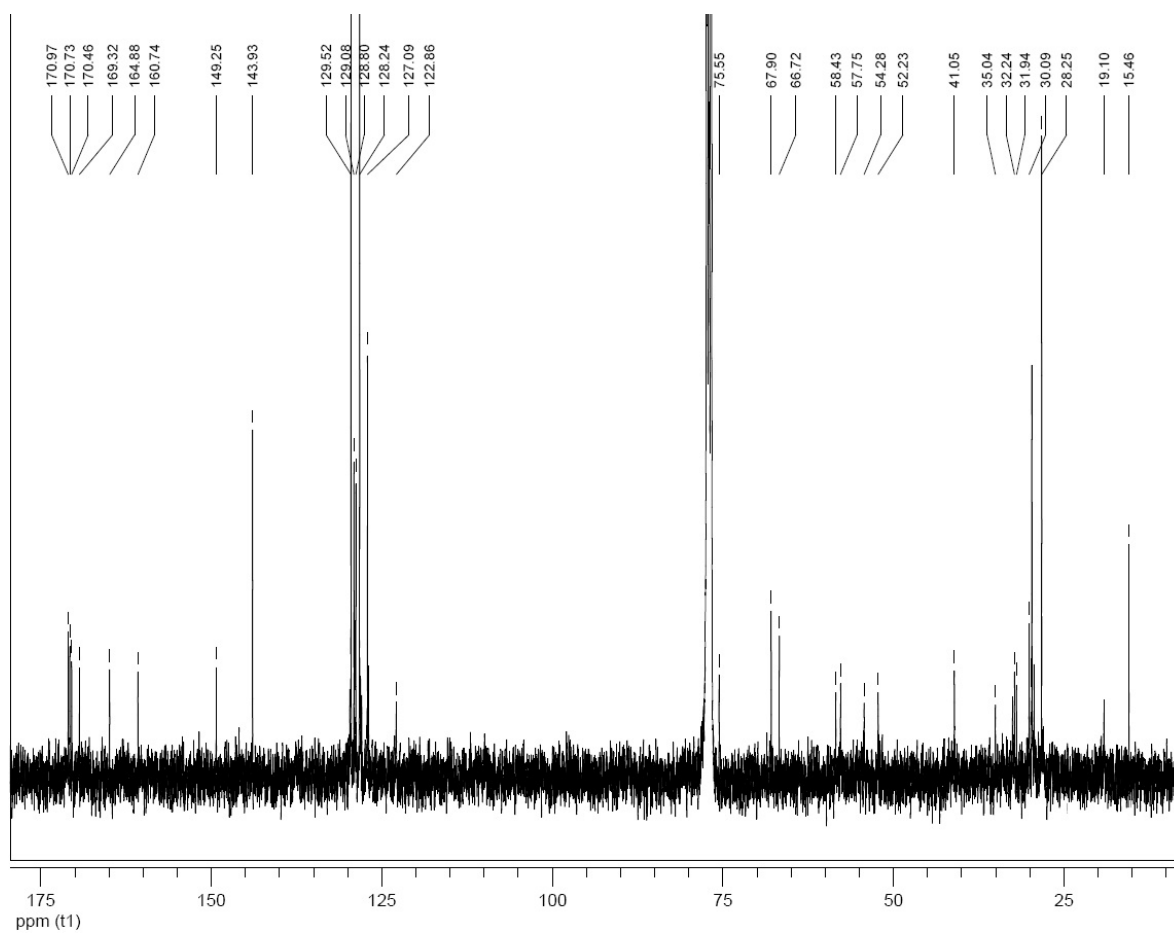

## HRMS – Macrocycle 21

### Generic Display Report (all)

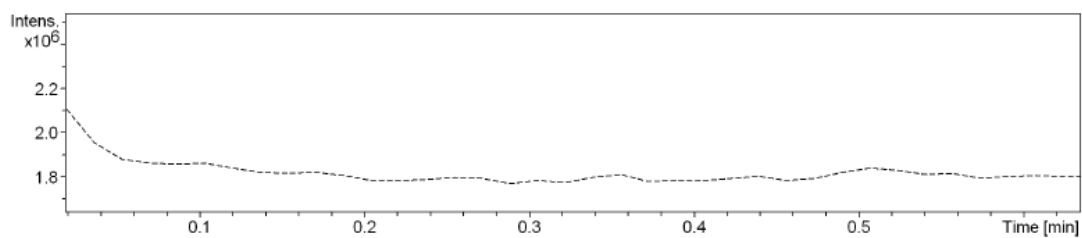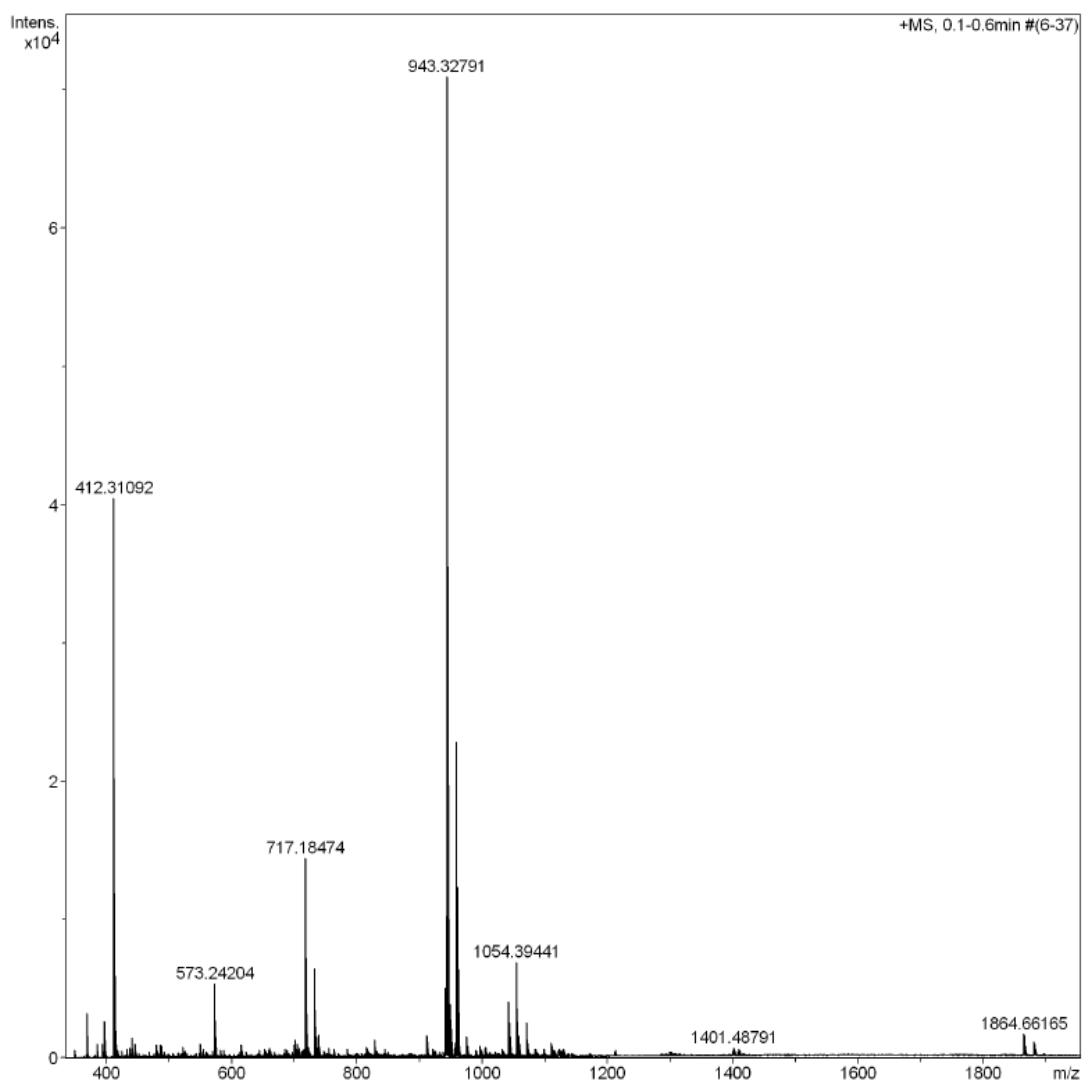

# IR – Macrocycle 21

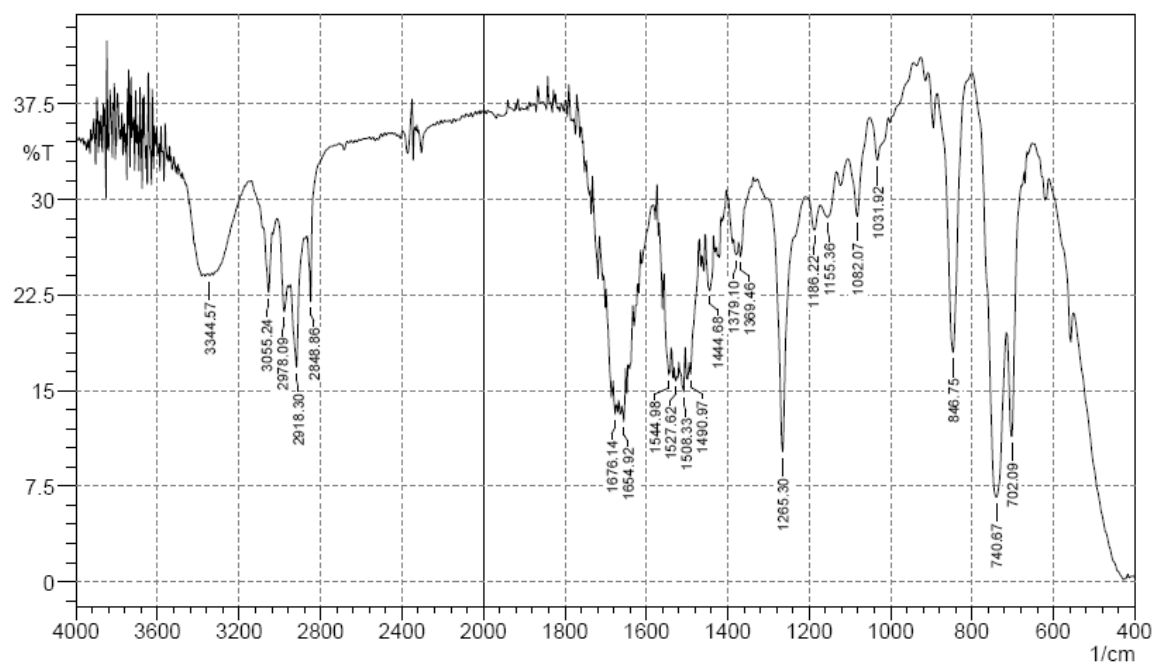

Supplement: c4md00135d1.pdf [file c4md00135d1.pdf]
